# **NATURAL SELECTION ON MHC IIb IN PARAPATRIC LAKE AND STREAM STICKLEBACK:**

## **BALANCING, DIVERGENT, BOTH, OR NEITHER?**

William E. Stutz<sup>1-3\*</sup> and Daniel I. Bolnick<sup>1</sup>

1. Department of Integrative Biology, University of Texas at Austin, One University Station  
C0990, Austin, TX, 78712, USA

2. Department of Ecology and Evolutionary Biology, University of Colorado at Boulder, Boulder,  
CO 80309, USA

3. Current address: Office of Institutional Research, Western Michigan University, 1903 W  
Michigan Ave. Kalamazoo MI 49008-5253, USA

\* Corresponding author: [william.stutz@gmail.com](mailto:william.stutz@gmail.com) Phone: (269) 387-4584, Fax: (269) 387-4377

**Keywords:** Major Histocompatibility Complex, divergent selection, balancing selection, *Gasterosteus*

**Running head:** Parapatric divergence of stickleback MHC

## 18 **Abstract**

19 Major histocompatibility (MHC) genes encode proteins that play a central role in vertebrates'  
 20 adaptive immunity to parasites. MHC loci are among the most polymorphic in vertebrates' genomes,  
 21 inspiring many studies to identify evolutionary processes driving MHC polymorphism within  
 22 populations, and divergence between populations. Leading hypotheses include balancing selection  
 23 favoring rare alleles within populations, and spatially divergent selection. These hypotheses do not  
 24 always produce diagnosably distinct predictions, causing many studies of MHC to yield inconsistent or  
 25 ambiguous results. We suggest a novel strategy to distinguish balancing versus divergent selection on  
 26 MHC, taking advantage of natural admixture between parapatric populations. With divergent  
 27 selection, immigrant alleles will be more infected and less fit because they are susceptible to novel  
 28 parasites in their new habitat. With balancing selection, locally-rare immigrant alleles will be more fit  
 29 (less infected). We tested these contrasting predictions using threespine stickleback from three  
 30 replicate pairs of parapatric lake and stream habitats. We found numerous positive and negative  
 31 associations between particular MHC II $\beta$  alleles and particular parasite taxa. A few allele-parasite  
 32 comparisons supported balancing selection, others supported divergent selection between habitats.  
 33 But, there was no overall tendency for fish with immigrant MHC alleles to be more or less heavily  
 34 infected. Instead, locally rare MHC alleles (not necessarily immigrants) were associated with heavier  
 35 infections. Our results illustrate the complex relationship between MHC II $\beta$  allelic variation and  
 36 spatially varying multi-species parasite communities: different hypotheses may be concurrently true  
 37 for different allele-parasite combinations.

## 38 Introduction

39 MHC class II loci, which aid in the recognition of extracellular parasites, are among the most  
 40 polymorphic loci in vertebrates' genomes (Figueroa *et al.* 1988). Evolutionary biologists have long  
 41 sought to elucidate the evolutionary processes that maintain the exceptional diversity of MHC within  
 42 and among populations. Most studies have focused on documenting parasite-mediated selection on  
 43 MHC given its role in immunity. Parasite-derived proteins (antigens) are collected and fragmented by  
 44 antigen presenting cells (Roche & Furuta 2015). MHC proteins bind to certain antigen sequences, and  
 45 export these to the cell surface for presentation to T-cells, which may then initiate an immune  
 46 response. MHC II  $\beta$  chains with different peptide binding region sequences enable recognition of  
 47 different parasite antigens (Eizaguirre & Lenz 2010; Hedrick 2002). Accordingly, MHC polymorphism  
 48 contributes to variation in resistance to parasites including pathogenic and symbiotic bacteria  
 49 (Bolnick *et al.* 2014; Kubinak *et al.* 2015; Lohm *et al.* 2002), viruses (Thursz *et al.* 1995), protozoa (Hill  
 50 *et al.* 1991; Sinigaglia *et al.* 1988; Wedekind *et al.* 2006), helminthes (Paterson *et al.* 1998), fungi  
 51 (Savage & Zamudio 2011), and even contagious cancers (Siddle *et al.* 2010). Despite these and many  
 52 other studies, it remains unclear how MHC polymorphism is sustained. The leading hypotheses  
 53 invoke balancing selection within populations, or divergent selection among populations, each of  
 54 which has received mixed support (Bernatchez & Landry 2003; Piertney & Oliver 2006; Tobler *et al.*  
 55 2014; Yasukochi & Satta 2013).

56 Balancing selection occurs when rare alleles gain an inherent fitness advantage over common  
 57 alleles, preventing their loss and maintaining allelic diversity (Takahata & Nei 1990; Takahata *et al.*  
 58 1992). Balancing selection can result from heterozygote advantage because individuals carrying more  
 59 diverse MHC alleles recognize and resist more diverse parasites (Doherty & Zinkernagel 1975; Oliver

60 *et al.* 2009), thanks to co-dominance (Lohm *et al.* 2002). Because rare alleles tend to occur in  
61 heterozygotes, they increase fitness and are protected from loss (Wegner *et al.* 2003). Alternatively,  
62 balancing selection can result from negative frequency-dependent selection. Parasites evolve  
63 strategies to exploit locally common host genotypes, such as evading detection by locally common  
64 MHC alleles (Slade & McCallum 1992). Because rare alleles do not provoke parasite counter-  
65 evolution, they may be more effective at detecting and protecting against local parasites (Muirhead  
66 2001; Schierup *et al.* 2000).

67         Divergent natural selection (divergent selection) is also widely invoked to explain MHC diversity  
68 (Hedrick 2002; Hill *et al.* 1991; Meyer & Thomson 2001). Parasite communities often differ among  
69 host populations, favoring different MHC alleles in different locations and driving between-  
70 population divergence but undermining local polymorphism. Many studies have invoked divergent  
71 selection on MHC to explain allele frequency differences between populations with different  
72 parasites (e.g., (Copley *et al.* 2007; Matthews *et al.* 2010; Pavey *et al.* 2013). But, many studies do not  
73 formally test the null hypothesis that MHC divergence is neutral and unrelated to parasitism (Miller *et al.*  
74 2010). Those that do consider neutrality often find mixed results: MHC divergence sometimes is  
75 greater than, less than, or equal to neutral genetic markers (Lamaze *et al.* 2014; Mona *et al.* 2008;  
76 Schwensow *et al.* 2007; Sutton *et al.* 2011). An alternative approach to test divergent selection is to  
77 evaluate whether different MHC alleles confer protection in different populations, using spatial  
78 variation in MHC-parasite associations to argue for divergent selection (e.g. (Eizaguirre *et al.* 2012a;  
79 Loiseau *et al.* 2009). Comparatively few studies have used experimental transplants or infections to  
80 test for of local adaptation at MHC loci (Eizaguirre *et al.* 2012a, b; Evans *et al.* 2010), and some of  
81 these have yielded negative results (Rauch *et al.* 2006).

Unfortunately, divergent and balancing selection may be difficult to distinguish because in certain contexts they can result in similar patterns, as pointed out by Spurgin and Richardson (2010) and more recently by Tobler et al. (2014). Both heterozygote advantage and negative frequency-dependent selection can lead to fluctuating allele frequencies through time (Slade & McCallum 1992). If these allele frequency fluctuations are asynchronous across host populations (Gandon 2002), then populations will be genetically divergent. Experimental transplants between such populations may (transiently) yield signals that appear to support divergent selection, even though MHC divergence arose from balancing selection within populations. Still more problematic, balancing and divergent selection are not mutually exclusive phenomena. Balancing selection may act within populations (driven by some parasites), while other parasites generate divergent selection favoring differences between populations. Simultaneous balancing and divergent selection may obscure each force's effect on within-population diversity and between-population divergence. Lastly, the majority of studies using MHC-parasite associations to test for selection have focused on one parasite species at a time. This inevitably yields an incomplete picture of the selective forces shaping diversity at MHC, especially because different parasites may drive different kinds of selection. Consequently, tests for balancing selection and divergent selection have yielded mixed evidence (Eizaguirre & Lenz 2010; Spurgin & Richardson 2010; Yasukochi & Satta 2013).

# *Balancing versus divergent selection in parapatry*

In certain settings, balancing and divergent natural selection can lead to unique and thus testable outcomes. In particular, we suggest they can be distinguished in parapatric populations that actively exchange migrants but experience distinct parasite communities (Fig. 1), by estimating three

104 parameters.  $\delta_m$  measures how strongly an allele  $m$  is enriched in a focal habitat.  $\theta_p$  measures how  
105 strongly a parasite taxon  $p$  is enriched in a focal habitat.  $\beta_{mp}$  measures the association between allele  
106  $m$  and parasite  $p$ ; negative values imply that the presence of the allele coincides with lower parasite  
107 abundance (Fig. 1A).

108 Divergent selection will tend to increase the abundance of an allele in the habitat where it  
109 confers a protective benefit ( $\beta_{mp} < 0$ ), or decrease the allele in a habitat where it confers susceptibility  
110 ( $\beta_{mp} > 0$ ). Consequently, alleles that are strongly enriched in a particular habitat ( $\delta_i$ ) should tend to be  
111 protective ( $\beta_{mp} < 0$ ) against parasites enriched in that same habitat ( $\theta_p > 0$ ). In the context of our study  
112 system (lake and stream populations of threespine stickleback, details below), this means that the  
113 more lake-biased alleles should protect against lake-biased parasites (and be susceptible to stream-  
114 biased parasites). Conversely, stream-biased alleles should protect against stream-biased parasites  
115 and be susceptible to typical lake parasites (Fig. 1B).

116 Balancing selection will tend to favor alleles that are locally rare, which in parapatric settings  
117 includes immigrants. Namely, when there is balancing selection we expect that alleles enriched in a  
118 particular habitat (relative to the neighboring habitat) will be particularly susceptible to parasites  
119 from that habitat ( $\beta_{mp} > 0$ ; Fig. 1C). In contrast, alleles that are scarce in a focal habitat will tend to  
120 protect against the local parasites (Muirhead 2001; Schierup *et al.* 2000). These locally rare alleles  
121 could be new mutations or (more frequently in a parapatric setting) immigrants (Lamaze *et al.* 2014).  
122 In this regard, balancing selection resembles local maladaptation, the diametric opposite of  
123 expectations for divergent selection.

124 Thus, divergent and balancing selection make opposite predictions regarding the sign of the  
125 correlation between  $\delta_m$  (the extent to which an allele is habitat-specific) and  $\beta_{mp}$  (the allele's effect on

126 parasites), for habitat-biased parasites ( $\theta_p$ ; Fig. 1). Do endemic macroparasites disproportionately  
 127 infect hosts with locally-enriched alleles (implying balancing selection) or locally-depleted alleles  
 128 (implying divergent selection)? To test these predictions we rely on natural migrants between  
 129 populations, which add rare genetic variants that are either beneficial (balancing selection), or  
 130 deleterious (divergent selection). Of course, both selective forces might act concurrently, for instance  
 131 if certain parasites select against immigrants while other parasites select against locally common  
 132 alleles. Therefore, any test of these alternative predictions should take into account the full set of  
 133 MHC alleles, and all common parasites within each population.

134       Some previous studies have used a related approach, testing whether MHC alleles confer  
 135 protection or susceptibility to different parasites in different habitats (e.g., estimating  $\beta_{mp}$ ) (Tobler *et al.*  
 136 2014). But, a key element of our approach is that the sign and strength of MHC-parasite  
 137 associations ( $\beta_{mp}$ ) will depend on the extent of between-population differences in parasite and allele  
 138 frequencies ( $\theta_p$  and  $\delta_m$ ). To our knowledge, previous studies of MHC adaptation have not tested for  
 139 an interactive effect of  $\theta_p$  and  $\delta_m$  on  $\beta_{mp}$  (parasite-habitat and allele-habitat biases jointly affecting  
 140 the parasite-allele association). Here, we use this novel approach to test for signatures of balancing or  
 141 divergent selection in connected (parapatric) lake and stream populations of threespine stickleback  
 142 (*Gasterosteus aculeatus*).

143

#### 144 *Study system: threespine stickleback*

145 Genetic sequencing suggests that threespine stickleback have between 4 and 6 functional MHC class  
 146 II $\beta$  loci in their genome (Reusch *et al.* 2004; Reusch & Langefors 2005; Sato *et al.* 1998), though this  
 147 may vary between individuals (Reusch & Langefors 2005). Expression analysis indicates that all

148 putative MHC class II $\beta$  loci are typically expressed (Reusch *et al.* 2004).

149 Prior studies of stickleback have provided evidence for balancing or divergent selection on  
150 MHC II $\beta$ . Balancing selection is supported by several observations. Individuals with an intermediate  
151 number of alleles are more resistant to infection (Kurtz *et al.* 2004; Wegner *et al.* 2004), harbor fewer  
152 parasites (Wegner *et al.* 2003), build better –quality nests (Jager *et al.* 2007), survive better (McCairns  
153 *et al.* 2011; Wegner *et al.* 2008), and attain higher lifetime reproductive success (Kalbe *et al.* 2009).  
154 Divergent selection is supported because MHC II $\beta$  allele differ between (i) co-occurring benthic and  
155 limnetic stickleback species pairs (Matthews *et al.* 2010), (ii) closely parapatric estuarine stickleback  
156 in Quebec (McCairns *et al.* 2011), and (iii) lake and river stickleback from northern Germany (Rauch *et al.*  
157 *et al.* 2006; Reusch *et al.* 2001). The German lake/river system has been used for experimental tests of  
158 divergent selection on MHC II $\beta$ . Lab-bred F2 lake-stream hybrids placed into field mesocosms gained  
159 more weight if they had local MHC alleles, but non-native MHC genotypes were not systematically  
160 more infected (Eizaguirre *et al.* 2012a). An earlier F2 hybrid transplant experiment found that  
161 genomic background but not MHC genotype explained habitat-specific infection rates (Rauch *et al.*  
162 2006).

163 Here, we present a simultaneous test both balancing and divergent natural selection on  
164 stickleback MHC II $\beta$  in three replicate lake-stream pairs of stickleback. We first document between-  
165 habitat differences in parasite composition ( $\theta_j$ ), and MHC genotypes ( $\delta_i$ ). Then, for each of the three  
166 pairs, we test for associations between each MHC II $\beta$  and each parasite taxon ( $\beta_{ij}$ ) within a multi-  
167 species parasite community. Lastly, we test whether allele-parasites associations covary positively or  
168 negatively with habitat differences in allele and parasite frequencies (Fig. 1). Specifically, we test  
169 whether locally common parasites disproportionately infect locally-enriched alleles, or locally-rare



170 immigrant alleles.

## 171 **Methods**

### 172 *Collections*

173 In July 2007, we sampled threespine stickleback from three lakes on northern Vancouver island,  
174 British Columbia (Roberts Lake, Farewell Lake, and Comida Lake) and their corresponding outlet  
175 streams (three ‘lake-stream pairs’, Fig. 2). Most lake-stream pairs on Vancouver Island evolved  
176 independently *in situ*, after marine stickleback colonized freshwater after Pleistocene deglaciation  
177 (Clague & James 2002; Hendry *et al.* 2013; Stuart *et al.* In review).

178 We collected adult stickleback using unbaited minnow traps (0.5-cm gauge). We placed traps  
179 haphazardly along the shoreline of each lake (< 3m depth) within 350 meters of the outlet stream,  
180 and at 5 traps at each of multiple locations along each lake’s outlet stream (Table 1, Fig. 2). Stream  
181 samples spanned the genetic clinal transition from lake- to stream-genotypes (Berner *et al.* 2009;  
182 Weber *et al.* 2017). Upon capture, fish were immediately euthanized in MS-222. Caudal fin clips were  
183 taken and preserved in 90% ethanol for later DNA extraction. Fish were preserved in 10% neutral  
184 buffered formalin. Collection and animal handling were approved by the University of Texas  
185 Institutional Animal Use and Care Committee (Protocol # 07-032201), and a Scientific Fish Collection  
186 Permit from the Ministry of the Environment of British Columbia (NA07-32612).

### 187 *Parasite load*

188 Each fish was exhaustively screened to enumerate macro-parasites (helminths, crustaceans, molluscs,  
189 and microsporidia) visible under a standard dissection microscope. This included scans of the outer

body (i.e. skin and bony armour structures), mouth and gills, interior body cavity including all organs (liver, swim bladder, gonads), the interior of the intestinal tract (stomach and intestine), and the eyes (interior and exterior). Only the gills on the right (but not left) side of the fish were scanned for parasites, as the common gill parasites (*Thersitina* sp. and *Unionidae* glochidia) were present at very high abundances on both left and right gills. All parasites were identified to the lowest possible taxonomic unit (genus in most cases).

196

# 197 *Analysis of habitat effect on infection*

To determine whether parasite abundance differed between lake and stream habitats, we first fit hierarchical generalized linear models separately for each lake stream pair. The GLMs used (additively) overdispersed-Poisson distributions to model each parasite taxon's abundance in individual fish. The basic form of each model was:

$$\begin{aligned} y_i &\sim \text{Poisson}(\lambda_i) \\ \lambda_i &= \exp(X\beta + \alpha_{j[i]} + \epsilon_i) \\ \alpha_j &\sim N(0, \sigma_j^2) \\ \epsilon_i &\sim N(0, \sigma_i^2) \end{aligned} \tag{1}$$

where  $y_i$  is the abundance of a focal parasite taxon in individual  $i$ . The term  $\alpha_j$  denotes a habitat-specific intercept where  $j$ =lake, or stream. The vector  $\beta$  includes the regression parameters  $\beta_1$  through  $\beta_5$  which indicate, respectively, the means for lake ( $\beta_1$ ) and stream ( $\beta_2$ ) habitat, the covariate effect of fish standard length of lake fish ( $\beta_3$ ) and stream fish ( $\beta_4$ ), and a coefficient for sex ( $\beta_5$ ). Random effects ( $\alpha_i$ ) associated with each sampled stream site (i.e. 100m, 200m, etc.), are modeled as a normal random variable with mean equal to zero and standard deviation  $\sigma_j$ . The error terms  $\epsilon_i$  that

208 account for overdispersion in the abundance data were also modeled as normal random variables  
209 with mean equal to zero and standard deviation  $\sigma_i$ . Sex was centered at zero, and length was  
210 centered at zero prior to fitting the models (Gelman & Hill 2006). Thus, the models explicitly account  
211 for the effects of sex, size, and heterogeneity among sampling locations (e.g., within-stream clines)  
212 and sample sizes when estimating mean abundances within each habitat ( $\beta_1$  and  $\beta_2$ ).

213 All parameters were estimated by drawing 1000 samples from their joint posterior distributions  
214 using the Markov Chain Monte Carlo (MCMC) algorithm implemented the *MCMCglmm* package  
215 (Hadfield 2010) in R version 3.2.1. Weakly informative normal priors with a scale of 3 and 10 were  
216 applied to all fixed slope and intercept coefficients respectively, providing some shrinkage of  $\beta$   
217 estimates away from extremely large values (Gelman *et al.* 2008). Half-Cauchy priors with scale equal  
218 to 10 were applied to  $\alpha_j$ 's, while a uniform prior was applied to the residual standard deviation  $\alpha_i$ . In  
219 cases where hyperparameter variances were close to zero, stronger half-Cauchy or inverse-Wishart  
220 priors were used to improve model convergence. MCMC chain parameters were determined  
221 heuristically by increasing the thinning interval until all estimated parameters achieved an  
222 autocorrelation less than 0.1.

223 As our metric of parasite habitat bias we calculated the posterior distributions for a derived  
224 parameter ( $\theta_p$ ), which was the log of the ratio of parasite  $p$ 's mean abundance estimates (on the data  
225 scale) between the lake and the stream. When  $\theta_p > 0$ , the focal parasite is more abundant in the lake,  
226 and when  $\theta_p < 0$  the parasite is more abundant in the stream. Parasites with greater than 95% percent  
227 posterior probability of being at least two times more abundant in one habitat that were considered  
228 strongly 'habitat-specific' in subsequent analyses. We use 'habitat-biased' to refer to weaker habitat  
229 effects.

## 230 *MHC sequencing and genotyping*

231       We genotyped MHC IIβ from a random subset of the fish that were screened for parasites  
232 (sample sizes listed in Table 2), by 454 pyrosequencing of PCR amplicons. The procedures for DNA  
233 extraction, quantitation, PCR amplification, and library preparation, and computational analysis are  
234 described fully in (Stutz & Bolnick 2014). We used PCR primers that produce a 210 base pair amplicon  
235 (excluding primer sequences) covering 75% of the length of exon 2 (210 bp out of 265 bp of exon2;  
236 (Stutz & Bolnick 2014). This covers 70 out of 88 amino acid residues, including the highly variable  
237 peptide binding region (PBR) of the exon (Lenz et al. 2009a). Of the 846 fish genotyped in the present  
238 study, 295 were previously described in Stutz and Bolnick (2014). We genotyped the additional  
239 samples in four new pyrosequencing runs (1/4 plate per run).

240       Our analytical pipeline uses a quasi-Dirichlet process to iteratively cluster similar sequence  
241 reads into groups at increasing levels of sequence similarity, and estimates whether clusters  
242 represent single true allelic variants present in the original sample (Stutz & Bolnick 2014). A separate  
243 research group independently tested this bioinformatics pipeline, using multiple datasets, and  
244 confirmed its accuracy (Sebastian *et al.* 2016). Allelic sequences for each individual were aligned to  
245 the cloned sequences in Sato et al. (1998) to ascertain phase, then translated into amino acid  
246 sequences for further analysis. Hereafter we refer to a unique amino acid sequence as an ‘allele’. We  
247 focus on allele presence or absence, because MHC is expected to have co-dominant effects on  
248 parasites (Doherty & Zinkernagel 1975).

249

## 250 *Analysis of habitat effect on MHC genotype*

251       We applied a similar hierarchical modeling approach estimate allele frequency bias between habitats

252 within each lake-stream pair. Because an MHC allele may be distributed across multiple paralogs, this  
253 is not a traditional allele frequency, but rather the proportion of fish carrying an allele. For each allele  
254 we fit the following model:

$$\begin{aligned} Pr(y_i = 1) &\sim \text{logit}^{-1}(X\beta + \alpha_{j[i]} + \epsilon_i) \\ \alpha_j &\sim N(0, \sigma_j^2) \\ \epsilon_i &\sim N(0, 1) \end{aligned} \quad (2)$$

255 where  $y_i=1$  indicates that fish  $i$  carries the allele. The vector  $\beta$  contains separate intercept coefficients  
256 for the lake and stream ( $\beta_1$  and  $\beta_2$ ) as well as coefficients for sex ( $\beta_3$ ) and size ( $\beta_4, \beta_5$ ) while the  $\alpha_j$   
257 term indicates additional (random) effects associated with each sampled stream site  $j$ . The variance  
258 of  $\epsilon_i$  was fixed at one due to non-identifiability of individual-level overdispersion in binomial GLMs  
259 (Gelman & Hill 2006). As with parasites, non- or weakly informative priors were used for all  
260 parameters, which were estimated by drawing 1000 samples from their joint posterior distributions  
261 using *MCMCglmm*.

262 As a metric of habitat bias (whether allele frequency was greater in one habitat or the other),  
263 we estimated the derived parameter  $\delta_m$  for each allele  $m$ , which is equal to the log of the ratio of  
264 allele frequency estimates for the lake and the stream. Alleles with  $\delta < 0$  are more common in the lake,  
265 and  $\delta > 0$  are more common in the stream. Alleles with a 95% posterior probability of occurring at  
266 least twice as frequently in one habitat were considered 'habitat-specific' in subsequent analyses. We  
267 use 'habitat-bias' to refer to a less stringent form of divergence (e.g., 95% posterior for  $\delta$  excludes 0).

## 268 *Estimating MHC allele effects on infection*

269 We next estimated whether the presence or absence of each MHC allele  $m$  in individual fish is

270 associated with each parasite taxon  $p$ 's abundance. If an allele helps the host recognize and resist a  
 271 particular parasite, then individuals with that allele should be less intensely infected by that parasite.  
 272 We call this a 'negative' allele-parasite association because the allele has a negative effect on the  
 273 parasite. Positive associations (an allele's presence coincides with heavier infection loads) can arise  
 274 for several reasons including susceptibility, if the parasite directly exploits that allele to establish an  
 275 infection (Westerdahl *et al.* 2012).

276 For each lake-stream pair, we used hierarchical models to estimate the effect of each MHC  
 277 allele on each parasite. The basic form of each model was:

$$\begin{aligned} y_i &\sim \text{Poisson}(\lambda_i) \\ \lambda_i &= \exp(X\beta + \alpha_j + \epsilon_i) \\ \alpha_j &\sim N(0, \sigma_j^2) \\ \epsilon_i &\sim N(0, \sigma_i^2) \end{aligned} \quad (3)$$

278 where  $y_i$  is the abundance of a given parasite taxon  $p$  in individual  $i$ . The vector  $\beta$  includes the same 5  
 279 regression coefficients as the parasite specificity models, plus an additional coefficient associated  
 280 with the presence/absence of the focal allele  $m$  ( $\beta_6$ ). As before, the  $\alpha_j$  term indicates sampling-  
 281 location effects on abundance (i.e. 'random' effects). The error term  $\epsilon_i$  gives the fitted residual error  
 282 for individual  $i$ , accounting for any observed overdispersion in the abundance data. For the few  
 283 instances where one MHC allele strongly covaried with another allele (Yule's  $|Q| > 0.8$ , see  
 284 Supplementary Material), we included the correlated (non-focal) allele as an additional factor in our  
 285 model. When two alleles were perfectly correlated, however, we dropped the less common allele.

286 Models were fit in a Bayesian probability framework using MCMC sampling implemented in  
 287 the *MCMCglmm* package (Hadfield 2010). Alleles were transformed from 0/1 variables to a  
 288 continuous variable with a mean zero to avoid issues with separation. Fish length was scaled to a

mean of zero and standard deviation of 1 (within habitats) prior to model fitting (Gelman *et al.* 2008). As before, MCMC chain parameters were determined heuristically by increasing the thinning interval until all estimated parameters achieved an autocorrelation less than 0.1. Posteriors for each allele/parasite combination were estimated by drawing 1000 samples from their joint posterior distributions. Posterior means, standard errors, and 95% high probability density intervals (HPDIs) for all estimated allele effect sizes were calculated from these posterior distributions.

We use the parameter  $\beta_6$  as our measure of the effect of allele  $m$  on parasite  $p$ , which we hereafter denote  $\beta_{m,p}$ . Because we assume that most true allele effects are zero (a given allele has no discernible effect on a given parasite), but that a few alleles will have moderate to strong effects on parasite abundance, those effects whose 95% HPDI's for  $\beta_{m,p}$  did not include zero were delineated as "non-zero" effects. Note that when  $\beta_{m,p} > 0$ , the focal allele is associated with higher abundance of the given parasite in a given habitat, and when  $\beta_{m,p} < 0$  the allele is associated with lower abundance. For shorthand we refer to these alternative outcomes as susceptibility and resistance, respectively.

### Testing for balancing or divergent selection

We used the estimates of MHC allele frequency differences between habitats ( $\delta_m$ ), parasite abundance differences between habitats ( $\theta_p$ ) and MHC-parasite association strengths ( $\beta_{mp}$  coefficient in model (3) above), to test for signatures of balancing or divergent selection using the logic explained in the introduction (Fig. 1). Specifically, we tested whether lake-biased alleles ( $\delta_m > 0$ ) disproportionately protect the host ( $\beta_{mp} < 0$ ) from lake-biased parasites ( $\theta_p > 0$ ), and conversely whether stream-biased alleles ( $\delta_m < 0$ ) protect the host ( $\beta_{mp} < 0$ ) from stream-specific parasites ( $\theta_p < 0$ ). When defining stream-specific parasites (or alleles), we retain those whose 95% HPDI of  $\theta_p$  (or  $\delta_m$ )

311 excludes zero. Our prediction can be tested with a linear model examining whether alleles' protective  
312 effects ( $\beta_{mp}$ ) depend on an interaction between the allele-frequency bias ( $\delta_m$ ) and which habitat a  
313 parasite is specific to ( $\theta_p$ ). Balancing selection should also generate a  $\delta_m * \theta_p$  interaction, but with the  
314 opposite slopes compared to divergent selection (Fig. 1C).

315 The above analysis focuses only on strongly lake- and stream-specific parasites, because these  
316 are most likely to drive divergent selection. As a consequence, that analysis omits parasites that are  
317 common or rare in both habitats. We repeated the analysis by regressing each MHC-parasite effect  
318 ( $\beta_{mp}$ ) on the relevant allele's habitat bias ( $\delta_m$ ), parasite's habitat bias ( $\theta_p$ ), and a  $\delta_m * \theta_p$  interaction,  
319 with habitat as a factor as well. We expected to observe a significant  $\delta_m * \theta_p$  interaction whose  
320 direction would distinguish between selection models.

321 The preceding tests focus on allele frequency differences between habitats ( $\delta_m$ ), rather than  
322 absolute allele frequencies within habitats. This is most appropriate when considering gene flow and  
323 divergent selection, but local absolute allele frequency may be more relevant to frequency-  
324 dependent selection by parasites. We therefore repeated the analyses described above, but using  
325 within-habitat MHC allele frequency instead of the between-habitat frequency difference ( $\delta_m$ ).  
326 Specifically, we regressed the MHC-parasite effect  $\beta_{mp}$  against the allele's frequency in whichever  
327 habitat the focal parasite is most abundant in (e.g., stream frequency when  $\theta_p < 0$ , lake frequency  
328 when  $\theta_p > 0$ ). We did this focusing on only the convincingly non-zero MHC-parasite associations  
329 (whose 95% HDPI excludes zero), and then again using all pairwise associations.



## 330 Results

### 331 *Parasite abundance differences between habitats*

332 A total of 34 parasite taxa were identified across the three lake-stream pairs, although not every  
 333 parasite was present in every population or pair (Fig. 3). Within each pair, the parasite community  
 334 differed substantially between habitats. Per-fish parasite richness was significantly higher in lake than  
 335 stream habitats for all three pairs (Fig. S1). More parasite taxa were strongly habitat-specific to lakes  
 336 ( $\theta_p \gg 0$ , for 8, 5, and 5 taxa in Comida, Farewell, Roberts Lakes respectively) than to their adjoining  
 337 streams (2, 0, and 0 taxa respectively). *Crepidostomum* was the only parasite that was considered  
 338 lake-specific in all three lake-stream pairs (Blackspot, *Thersitina*, and *Unionidae* were lake-specific in  
 339 two of three pairs). *Anisakis* and *Bunodera* met our approaches our strict habitat-specific threshold in  
 340 the three streams. But, most parasites exhibit variable, weak, or no habitat affiliation (Fig. 3).

### 341 *Allele prevalence differences between habitats*

342 We identified 374 unique MHC alleles across our three lake-stream pairs, 95% of which were  
 343 restricted to a single lake-stream pair. Within each lake-stream pair, up to 13% of the MHC alleles  
 344 were strongly habitat-specific (at least a 2-fold frequency difference,  $|\delta_m| \gg 0$ ; Fig. 4). There  
 345 were more lake-specific alleles (9, 7, and 9 in Comida, Farewell, and Roberts respectively) than  
 346 stream-specific (2, 6, 2 respectively). No allele was habitat-specific in more than one lake-stream pair.  
 347 For the 19 alleles shared among replicate pairs we found no parallel evolution of habitat differences  
 348 (e.g.,  $\delta_m$  was not correlated across independent pairs).

349 The diversity of MHC is comparable between habitats (Fig S2). All sites exhibit on average about  
 350 six unique MHC amino acid sequences per fish, albeit with substantial among-individual variation. In

351 contrast, neutral genomic SNPs exhibited consistently lower nucleotide diversity in stream than lake  
352 fish (Fig. S3). Consequently, relative to neutral expectations MHC diversity is relatively higher in  
353 stream stickleback than in lake stickleback.

#### 354 *Associations between MHC alleles and parasite infection*

355 We estimated association strengths ( $\beta_{mp}$ ) between a total of 6006 combinations of MHC allele versus  
356 parasite taxon. Models for an additional 678 possible allele-parasite combinations failed to converge  
357 adequately, usually due to low extreme rarity of the parasite or allele. For the few cases where two  
358 alleles are statistically strongly linked (see Supp. Mat. on Yule's Q), we dropped one of the redundant  
359 alleles. These tests found a substantial number of robust associations. Sixty-two MHC allele – parasite  
360 taxon associations had 95% HPDIs that did not include zero (Figs. 4&5, Table 4). No single allele is  
361 strongly associated with more than one parasite.

362 Overall, there were approximately 50% more negative than positive effects estimated within  
363 each pair (Table 3). Negative associations imply that fish carrying the focal allele are less-heavily  
364 infected by the focal parasite. The bias towards negative effects may be an artifact of comparing rare  
365 alleles to rare parasites, so henceforth we restrict our attention to strongly supported associations.  
366 Of those strong effects, 23 were negative. For example, stream-biased allele P293 coincided with an  
367 18 fold reduction ( $\beta=-2.87$  [-5.17,-0.78]) in the abundance of the lake-specific parasite  
368 *Crepidostomum* in Comida Lake (Fig. S4). Another 39 strong effects were positive, for instance lake-  
369 specific allele P342, associated with an 16-fold increase ( $\beta=2.75$ , [1.25,4.11]) in (lake-specific)  
370 Blackspot infection loads.

371 Several of the strong MHC-parasite associations exhibit a pattern consistent with local  
372 adaptation via divergent selection (Table S4): rare alleles conferring susceptibility to local parasites.

373 Fish carrying MHC allele P273 carry ~3-fold more *Unionidae* (Fig. S5), which may explain why this  
374 allele is less common in the lake ( $\delta = -2.73$  [-4.68, -1.15]) where *Unionidae* are 314-fold more abundant  
375 ( $\theta = 5.75$ , [4.38, 7.27]). Conversely, two MHC alleles are rarer in Comida stream and confer  
376 susceptibility to stream-specific *Apatemon*.

377 Other strong MHC-parasite associations support balancing selection: common alleles  
378 conferring susceptibility to local parasites. MHC allele P231 is 12-fold more common in Roberts Lake  
379 than stream ( $\delta = 2.50$  [0.84, 4.36]). In the lake, it confers a 4-fold greater probability of infection by a  
380 lake-specific cestode (Fig. S6;  $\theta = 6.93$ , [5.12, 9.31]). Similarly, allele P403 is 72-fold more common in  
381 the Comida Lake ( $\delta = 4.28$  [2.13, 6.94]) where it confers 3-fold higher risk of infection by lake-specific  
382 *Crepidostomum* ( $\theta = 2.99$ , [2.14, 3.91]; Fig. S7). Assuming these parasites reduce host fitness, these  
383 associations favor locally rare alleles over the currently-abundant P231 or P403 alleles.

#### 384 *Tests for divergent or balancing selection*

385 Aggregating across many such allele-parasite associations, we found no overall trends towards  
386 towards divergent or balancing selection. Regressions revealed no significant effect of habitat-biased  
387 MHC allele frequency ( $\delta_m$ ) on the posterior mean estimate of the strong MHC-parasite associations  
388 ( $\beta_{mp}$ ; Fig. 6A). There was no significant relationship for either lake-specific parasites ( $\theta_p > 0$ ,  $t_{40} = 1.22$ ,  
389  $P = 0.246$ ), or stream-specific parasites ( $\theta_p < 0$ ,  $t_{18} = 0.465$ ,  $P = 0.647$ ). Lake-stream pair had no effect in  
390 either regression ( $P > 0.2$ ). Putting these regressions into a single ANCOVA, we confirmed that the  
391 slopes of  $\beta_{mp} \sim \delta_m$  were indistinguishable from zero for both lake- and stream-specific parasites  
392 (overall  $\delta_m$  effect  $P = 0.1876$ ). There was no significant interaction between  $\delta_m$  and parasite-habitat  
393 ( $P = 0.733$ ), thus refuting both hypotheses' expectation of opposing slopes for lake- versus stream-  
394 specific parasites. The effect of  $\delta_m$  and the  $\delta_m$ \*habitat interaction were also non-significant if we

395 expanded the analysis to include all MHC-parasite associations ( $\beta_{mp}$ , regardless of their strength,  
396 using only habitat-specific parasites. We expanded this still further to use all 6006  $\beta_{mp}$  estimates  
397 (regardless of strength of  $\delta_m$ ,  $\theta_p$ , or  $\beta_{mp}$ ) we still found no significant  $\theta_m * \delta_p$  interaction ( $t_{6680}=1.49$ ,  
398  $P=0.1365$ ). The only significant effect was that all MHC alleles (regardless of  $\delta_m$ ) were more  
399 susceptible to lake-biased parasites than stream-biased parasites (Fig. S8; positive effect of  $\theta_p$  on  $\beta_{mp}$ ;  
400  $t_{6680}=2.47$ ,  $P=0.0137$ ).

401 Lastly, we tested for effects of local allele frequency, rather than allele habitat-bias. MHC-  
402 parasite effect sizes ( $\beta_{mp}$ ) were negatively correlated with the focal allele's frequency in the habitat  
403 where the parasite is relatively common (Fig. 7). This is true whether we focus only on large-effect  
404 estimates of  $\beta_{mp}$  ( $t_{60}=-3.87$ ,  $P=0.00028$ ), or on all estimates of  $\beta_{mp}$  ( $t_{6682}=-2.10$ ,  $P=0.0446$ ). For either  
405 variant on the analysis, the effects are weak ( $r^2=0.186$  and  $0.0005$ , respectively). The negative trend  
406 arises because locally rare alleles (which are not necessarily immigrants) are most likely to confer  
407 susceptibility to local parasites ( $\beta_{mp}>0$ ). In contrast, locally common alleles are equally likely to exhibit  
408 positive or negative effects on local parasites (Fig. 7).

## 409 Discussion

410 Stickleback in lake and stream habitats harbor distinct but overlapping MHC class II genotypes, and  
411 substantial MHC diversity within populations (Chain *et al.* 2014; Eizaguirre *et al.* 2012a; Stutz &  
412 Bolnick 2014). We tested whether this between- and within-population MHC variation systematically  
413 supports a role of divergent versus balancing selection. We estimated pairwise statistical associations  
414 between 374 MHC alleles and 34 parasite taxa in three replicate lake-stream pairs, revealing a  
415 moderate number of clear associations between the presence of an MHC allele and less or greater

infection by a particular parasite. This represents an exceptional survey of MHC-parasite associations in nature, revealing many more MHC-parasite associations than we expected, though most alleles were strongly associated with just a single parasite, if any. These associations included both positive and negative effects that may be loosely interpreted as evidence of susceptibility and resistance respectively.

These associations do not, by themselves, provide a clear test for divergent or balancing selection (Piertney & Oliver 2006). Instead, the MHC-parasite associations should be interpreted in the context of the alleles' and parasites absolute or relative frequencies in each habitat (Fig. 1). To our knowledge, this has not previously been reported. We found a few MHC-parasite associations that clearly supported with either balancing or divergent selection. But, was no overall tendency for immigrant MHC alleles to be more susceptible to local parasites (implying divergent selection) or less susceptible (implying balancing selection). Instead, we found a weak but unexpected trend for locally rare (but not foreign) alleles to confer greater infection susceptibility.

We observed significant between-habitat differences in parasite community composition. A few parasites were systematically habitat-specific or habitat-biased (*Crepidostomum*, Unionidae, Thersitina, and Blackspot in lakes; Anisakis, Apatemon and Bunodera in streams). Consistent with prior findings from other lake-stream pairs (Eizaguirre *et al.* 2010; Feulner *et al.* 2015), stream parasite communities were a less diverse subset of the neighboring lake parasites.

We expected these differences in parasite community composition to generate divergent natural selection on stickleback immune genes. Consistent with this expectation, we observed significant differences in MHC genotypes between parapatric lake and stream sites. Approximately 10% of alleles exhibit substantial (> 2-fold) frequency differences between parapatric habitats. But,

438 genomic SNPs (most of which will be neutral) also exhibit significant divergence along the sampled  
439 clines (Weber *et al.* 2017). Despite divergence in MHC genotypes, we saw little evidence for local  
440 adaptation. A few alleles are rare in habitats where they confer susceptibility to a parasite (e.g., P273  
441 is rare in Comida Lake where Unionidae is common). Such patterns may arise if selection largely  
442 eliminates alleles from habitats where they are detrimental. However, this depletion of locally  
443 susceptible alleles involves only a few MHC alleles from Comida. Taking a larger view across many  
444 allele-parasite associations, we found no general trend for alleles common in a given habitat to  
445 confer (i) protection against that habitat's parasites, or (ii) susceptibility to parasites in the  
446 neighboring habitat. The prediction illustrated in Fig. 1B is therefore not supported.

447         In a few cases, we found rare MHC alleles associated with reduced infection rates. This  
448 apparent rare-allele advantage fits expectations from balancing selection. However, as with local  
449 adaptation, this particular outcome is confined to a few examples. There is no overall tendency for  
450 locally rare alleles to be more resistant (or, locally common alleles to be more susceptible). We  
451 therefore found no overall support for balancing selection in any of the three lake-stream pairs,  
452 despite trying multiple variants on our analytical approach.

453         An alternative approach to testing balancing selection is to ask whether MHC-parasite  
454 associations depend on allele frequency *within* a given habitat, rather than frequency differences  
455 between habitats. We find that locally rare alleles tend to confer susceptibility to local parasites,  
456 whereas locally common alleles are equally likely to be susceptible or resistant. This result is  
457 consistent with the notion that selection removes alleles that are susceptible to local parasites. But,  
458 by focusing specifically on local allele frequency (rather than between-habitat frequency difference),  
459 this result does not prove that *different* alleles are favored in the two habitats. Indeed, the

460 susceptible rare alleles are typically not immigrants (e.g., not more common in the other habitat).

461 To summarize, we proposed contrasting predictions to distinguish between balancing versus  
462 divergent selection. Both predictions were supported by a few allele-parasite combinations, but  
463 neither was supported overall. There may be several explanations for these equivocal results. First,  
464 divergent- and balancing selection may in fact be weak or absent. This conclusion would be odd,  
465 given the high MHC diversity within populations and divergence between adjoining populations that  
466 readily exchange migrants. Second, MHC has been widely linked to mate choice decisions in  
467 stickleback and other vertebrates (Lenz *et al.* 2009; Milinski 2006), so divergent sexual selection,  
468 might plays a primary role in MHC population structure. Lastly, divergent and balancing selection  
469 might act concurrently. As we show here, some parasites might drive divergence in some alleles'  
470 frequencies, while other parasites target locally common alleles. But, the net effect may be that these  
471 two selective processes obscure each other's signals in an overall meta-analysis, as we find.

472 Some additional caveats are worth noting. Our results are based on a brief survey of three lake-  
473 stream pairs in a single season and year. It may be that the strongest selection occurs at another  
474 season, ontogenetic stage, or year. Also, we focused exclusively on readily visible macroparasites, but  
475 MHC evolution could plausibly also depend on readily overlooked symbionts including but not limited  
476 to gut microbiota (Bolnick *et al.* 2014). Lastly, although some stickleback parasites are well known to  
477 reduce host fitness, we do not presently know how host survival or fecundity depend on infection  
478 loads of all parasites examined here.

479 We observed a substantial number of MHC allele –parasite associations, consistent with typical  
480 expectations that MHC II $\beta$  is involved in immunity to macroparasites. However, it is surprising that  
481 positive and negative associations ('susceptibility' and 'resistance', respectively) were about equally

482 common. Why would so many MHC alleles, when present in a fish, coincide with greater infection by  
483 a certain parasite? A first possibility is that positive effects are spurious consequences of having  
484 alternative alleles. The presence of one allele may imply the absence of an alternative allele with  
485 protective value. This explanation is unlikely in our present study, because we statistically accounted  
486 for moderately correlated alleles. A second explanation could be that an allele facilitating recognition  
487 of one parasite might result in immunological trade-offs that inhibit resistance to another parasite.  
488 For instance, an MHC allele that recognized a microbe might drive an inflammatory response that  
489 inhibits resistance to a subsequent helminth infection (Moser & Murphy 2000; Oladiran & Belosevic  
490 2012; Salgame *et al.* 2013). A third possibility entails direct interactions among parasites. If one  
491 parasite inhibits invasion of another parasite, then an allele that resists the former may facilitate  
492 infection by the latter (Hafer & Milinski 2015). Lastly, because we are sampling wild-caught adult fish,  
493 a positive correlation between genotype and infection could reflect a tolerance effect of the allele. If  
494 individuals with a given allele are more likely to survive a chronic infection, the allele will be enriched  
495 among infected survivors, compared to uninfected individuals (Westerdahl *et al.* 2012). This last point  
496 brings up an important caveat about our analysis: we assume that higher infection load implies lower  
497 fitness, but variation in infection tolerance, and survival prior to our sampling effort, complicates this  
498 interpretation.

499 Prior studies of stickleback have suggested that MHC heterozygosity is itself under stabilizing  
500 selection (Wegner *et al.* 2004; Wegner *et al.* 2003). The suggestion is that individuals with few MHC  
501 alleles are unable to recognize enough parasites, whereas individuals with too many alleles have  
502 reduced T-cell receptor diversity, resulting in an intermediate optimal MHC heterozygosity. Prior  
503 studies suggested that lower parasite diversity in streams than in lakes, causes a lower optimal allelic



diversity (Feulner *et al.* 2015). In contrast, we find comparable MHC diversity in the lake and stream populations, even though the stream parasite community is less diverse. Moreover, stream sticklebacks had lower effective population sizes based on genomic SNP data (Weber *et al.* 2017). So, MHC diversity is actually relatively high in the stream (compared to neutral markers) despite their lower parasite diversity. Our samples therefore do not support the proposal that stream stickleback have a lower optimal MHC diversity.

510

# *Conclusions*

A great many studies have tested for divergent or balancing selection on MHC, in numerous vertebrate species (reviewed by (Bernatchez & Landry 2003; Edwards & Hedrick 1998; Eizaguirre & Lenz 2010; Hedrick 2002; Piertney & Oliver 2006; Yasukochi & Satta 2013). Few of these studies have simultaneously tested for both forms of selection (Tobler *et al.* 2014). Most of these studies yield some support for one hypothesis or the other, but frequently the supporting evidence has important caveats and some inconsistencies. Consequently, the evolutionary maintenance of MHC diversity within and between populations remains something of a puzzle despite extensive research. Our own data exacerbate this puzzle. We found some support for both divergent and balancing selection, depending on which allele and parasite we considered. But, at the scale of all alleles and parasites, we found no predominant signal favoring one form of selection over the (Fig. 1).

We propose that there in fact may not be a predominant form of selection at this multi-locus gene family. Rather, balancing and divergent selection act simultaneously on different MHC II alleles, in association with different parasites. Some alleles may experience a native advantage, while others may experience a rare-allele advantage. Current analytical approaches are not effective at separating

526 such simultaneous forms of selection. Future work on MHC evolution must therefore account for  
527 many parasite species concurrently, and the distinct but simultaneous selective pressures that each  
528 may exert.

## 529 **Acknowledgments**

530 We thank Claire Patenia and Jason Clu for lab assistance. This research was supported by  
531 fellowships to DIB from the David and Lucile Packard Foundation and the Howard Hughes Medical  
532 Institute, and a grant to WES from the Graduate Program in Ecology Evolution and Behavior at UT  
533 Austin.

## 534 **References**

- 535 Bernatchez L, Landry C (2003) MHC studies in nonmodel vertebrates: what have we learned about  
536 natural selection in 15 years? *Journal of Evolutionary Biology* **16**, 363-377.
- 537 Berner D, Grandchamp A-C, Hendry AP (2009) Variable progress toward ecological speciation in  
538 parapatry: stickleback across eight lake-stream transitions. *Evolution* **63**, 1740-1753.
- 539 Bolnick D, Snowberg LK, Caporaso JG, *et al.* (2014) Major Histocompatibility Complex IIB  
540 polymorphism contributes to among-individual variation in gut microbiota composition.  
541 *Molecular Ecology* **23**, 4831-4845.
- 542 Chain FJ, Feulner PG, Panchal M, *et al.* (2014) Extensive copy-number variation of young genes across  
543 stickleback populations. *PLoS Genet* **10**, e1004830.
- 544 Clague JJ, James TS (2002) History and isostatic effects of the last ice sheet in southern British  
545 Columbia. *Quaternary Science Reviews* **21**, 71-87.
- 546 Copley R, Blais J, Rico C, *et al.* (2007) MHC adaptive divergence between closely related and sympatric  
547 african cichlids. *PLoS ONE* **2**, e734.
- 548 Doherty PC, Zinkernagel RM (1975) Enhanced immunological surveillance in mice heterozygous at the  
549 H-2 gene complex. *Nature* **256**, 50-52.
- 550 Edwards SV, Hedrick PW (1998) Evolution and ecology of MHC molecules: from genomics to sexual  
551 selection. *Trends in Ecology & Evolution* **13**, 305-311.
- 552 Eizaguirre C, Lenz TL (2010) Major histocompatibility complex polymorphism: dynamics and  
553 consequences of parasite-mediated local adaptation in fishes. *Journal of Fish Biology* **77**, 2023-  
554 2047.
- 555 Eizaguirre C, Lenz TL, Kalbe M, Milinski M (2012a) Divergent selection on locally adapted major  
556 histocompatibility complex immune genes experimentally proven in the field. *Ecology Letters*  
557 **15**, 723-731.

- 558 Eizaguirre C, Lenz TL, Kalbe M, Milinski M (2012b) Rapid and adaptive evolution of MHC genes under  
559 parasite selection in experimental vertebrate populations. *Nature communications* **3**, 621.
- 560 Eizaguirre C, Lenz TL, Sommerfeld RD, *et al.* (2010) Parasite diversity, patterns of MHC II variation and  
561 olfactory based mate choice in diverging three-spined stickleback ecotypes. *Evolutionary*  
562 *Ecology* **25**, 605-622.
- 563 Evans ML, Neff BD, Heath DD (2010) MHC-mediated local adaptation in reciprocally translocated  
564 Chinook salmon. *Conservation Genetics* **11**, 2333-2342.
- 565 Feulner PG, Chain FJ, Panchal M, *et al.* (2015) Genomics of divergence along a continuum of  
566 parapatric population differentiation. *PLoS Genet* **11**, e1004966.
- 567 Figueroa F, Günther E, Klein J (1988) MHC polymorphism pre-dating speciation. *Nature* **335**, 265-267.
- 568 Gandon S (2002) Local adaptation and the geometry of host-parasite coevolution. *Ecology Letters* **5**,  
569 246-256.
- 570 Gelman A, Hill J (2006) *Data Analysis Using Regression and Multilevel/Hierarchical Models* Cambridge  
571 University Press, New York.
- 572 Gelman A, Jakulin A, Pittau MG, Su Y-S (2008) A weakly informative default prior distribution for  
573 logistic and other regression models. *Annals of Applied Statistics* **2**, 1360-1383.
- 574 Hadfield J (2010) MCMC methods for multi-response generalized linear mixed models: the  
575 MCMCglmm R package. *Journal of Statistical Software* **33**, 1-22.
- 576 Hafer N, Milinski M (2015) When parasites disagree: evidence for parasite-induced sabotage of host  
577 manipulation. *Evolution* **69**, 611-620.
- 578 Hedrick PW (2002) Pathogen resistance and genetic variation at MHC loci. *Evolution* **56**, 1902-1908.
- 579 Hendry AP, Kaeuffer RE, Crispo E, Peichel CL, Bolnick DI (2013) Evolutionary inferences from  
580 exchangeability: individual classification approaches based on the ecology, morphology, and  
581 genetics of lake-stream stickleback population pairs. *Evolution* **67**, 3429-3441.
- 582 Hill AV, Allsopp CE, Kwiatkowski D, *et al.* (1991) Common west African HLA antigens are associated  
583 with protection from severe malaria. *Nature* **352**, 595-600.
- 584 Jager I, Eizaguirre C, Griffiths SW, *et al.* (2007) Individual MHC class I and MHC class IIB diversities are  
585 associated with male and female reproductive traits in the three-spined stickleback. *Journal of*  
586 *Evolutionary Biology* **20**, 2005-2015.
- 587 Kalbe M, Eizaguirre C, Dankert I, *et al.* (2009) Lifetime reproductive success is maximized with optimal  
588 major histocompatibility complex diversity. *Proceedings of the Royal Society of London B:*  
589 *Biological sciences* **276**, 925-934.
- 590 Kubinak JL, Stephens WZ, Soto R, *et al.* (2015) MHC variation sculpts individualized microbial  
591 communities that control susceptibility to enteric infection. *Nature Communications* **6**, 8642.
- 592 Kurtz J, Kalbe M, Aeschlimann PB, *et al.* (2004) Major histocompatibility complex diversity influences  
593 parasite resistance and innate immunity in sticklebacks. *Proceedings of the Royal Society B:*  
594 *Biological Sciences* **271**, 197-204.
- 595 Lamaze FC, Pavey SA, Normandeau E, *et al.* (2014) Neutral and selective processes shape MHC gene  
596 diversity and expression in stocked brook charr populations (*Salvelinus fontinalis*). *Molecular*  
597 *Ecology* **23**, 1730-1748.
- 598 Lenz TL, Eizaguirre C, Scharsack JP, Kalbe M, Milinski M (2009) Disentangling the role of MHC-  
599 dependent 'good genes' and 'compatible genes' in mate-choice decisions of three-spined  
600 sticklebacks *Gasterosteus aculeatus* under semi-natural conditions. *Journal of Fish Biology* **75**,  
601 2122-2142.

- 602 Lohm J, Grahn M, Langefors A, *et al.* (2002) Experimental evidence for major histocompatibility  
603 complex-allele-specific resistance to a bacterial infection. *Proceedings of the Royal Society B:*  
604 *Biological Sciences* **269**, 2029-2033.
- 605 Loiseau C, Richard M, Garnier S, *et al.* (2009) Diversifying selection on MHC class I in the house  
606 sparrow (*Passer domesticus*). *Molecular Ecology* **18**, 1331-1340.
- 607 Matthews B, Harmon LJ, M'Gonigle L, Marchinko KB, Schaschl H (2010) Sympatric and allopatric  
608 divergence of MHC genes in threespine stickleback. *PLoS ONE* **5**, e10948.
- 609 McCairns RJS, Bourget S, Bernatchez L (2011) Putative causes and consequences of MHC variation  
610 within and between locally adapted stickleback demes. *Molecular Ecology* **20**, 486-502.
- 611 Meyer D, Thomson G (2001) How selection shapes variation of the human major histocompatibility  
612 complex: a review. *Annals of Human Genetics* **65**, 1-26.
- 613 Milinski M (2006) The Major Histocompatibility Complex, sexual selection, and mate choice. *Annual*  
614 *Review of Ecology, Evolution, and Systematics* **37**, 159-186.
- 615 Miller HC, Allendorf F, Daugherty CH (2010) Genetic diversity and differentiation at MHC genes in  
616 island populations of tuatara (*Sphenodon* spp.). *Molecular Ecology* **19**, 3894-3908.
- 617 Mona S, Crestanello B, Bankhead-Dronnet S, *et al.* (2008) Disentangling the effects of recombination,  
618 selection, and demography on the genetic variation at a major histocompatibility complex  
619 class II gene in the alpine chamois. *Molecular Ecology* **17**, 4053-4067.
- 620 Moser M, Murphy KM (2000) Dendritic cell regulation of TH1-TH2 development. *Nature Immunology*  
621 **1**, 199-205.
- 622 Muirhead CA (2001) Consequences of population structure on genes under balancing selection.  
623 *Evolution* **55**, 1532-1541.
- 624 Oladiran A, Belosevic M (2012) Immune evasion strategies of trypanosomes: a review. *The Journal of*  
625 *Parasitology* **98**, 284-292.
- 626 Oliver MK, Telfer S, Pierny SB (2009) Major histocompatibility complex (MHC) heterozygote  
627 superiority to natural multi-parasite infections in the water vole (*Arvicola terrestris*).  
628 *Proceedings of the Royal Society of London B: Biological Sciences* **276**, 1119-1128.
- 629 Paterson S, Wilson K, Pemberton JM (1998) Major histocompatibility complex variation associated  
630 with juvenile survival and parasite resistance in a large unmanaged ungulate population (*Ovis*  
631 *aries* L.). *Proceeding of the National Academy of Sciences* **95**, 3714-3719.
- 632 Pavey SA, Sevellec M, Adam W, *et al.* (2013) Nonparallelism in MHCII $\beta$  diversity accompanies  
633 nonparallelism in pathogen infection of lake whitefish (*Coregonus clupeaformis*) species pairs  
634 as revealed by next-generation sequencing. *Molecular Ecology* **22**, 3833-3849.
- 635 Pierny SB, Oliver MK (2006) The evolutionary ecology of the major histocompatibility complex.  
636 *Heredity* **96**, 7-21.
- 637 Rauch G, Kalbe M, Reusch TBH (2006) Relative importance of MHC and genetic background for  
638 parasite load in a field experiment. *Evolutionary Ecology Research* **8**, 373-386.
- 639 Reusch TB, Schaschl H, Wegner KM (2004) Recent duplication and inter-locus gene conversion in  
640 major histocompatibility class II genes in a teleost, the three-spined stickleback.  
641 *Immunogenetics* **56**, 427-437.
- 642 Reusch TBH, Langefors Å (2005) Inter- and intralocus recombination drive MHC class II $\beta$  gene  
643 diversification in a teleost, the three-spined stickleback *Gasterosteus aculeatus*. *Journal of*  
644 *Molecular Evolution* **61**, 531-541.
- 645 Reusch TBH, Wegner KM, Kalbe M (2001) Rapid genetic divergence in postglacial populations of

- 646 threespine stickleback (*Gasterosteus aculeatus*): The role of habitat type, drainage and  
647 geographical proximity. *Molecular Ecology* **10**, 2435-2445.
- 648 Revell W (2016) *psych: Procedures for Personality and Psychological Research*. Northwestern  
649 University, Evanston, Illinois, USA,. <http://CRAN.R-project.org/package=psych>
- 650 Roche PA, Furuta K (2015) The ins and outs of MHC class II-mediated antigen processing and  
651 presentation. *Nature Reviews Immunology* **15**, 203-2016.
- 652 Salgame P, Yap GS, Gause WC (2013) Effect of helminth-induced immunity on infections with  
653 microbial pathogens. *Nat Immunol* **14**, 1118-1126.
- 654 Sato A, Figueroa F, O'hUigin C, Steck N, Klein J (1998) Cloning of major histocompatibility complex  
655 (Mhc) genes from threespine stickleback, *Gasterosteus aculeatus*. *Molecular Marine Biology  
656 and Biotechnology* **7**, 221-231.
- 657 Savage AE, Zamudio KR (2011) MHC genotypes associate with resistance to a frog-killing fungus.  
658 *Proceedings Of The National Academy Of Sciences Of The United States Of America* **108**,  
659 16705-16710.
- 660 Schierup MH, Vekemans X, Charlesworth D (2000) The effect of subdivision on variation at multi-  
661 allelic loci under balancing selection. *Genetics Research* **76**, 51-62.
- 662 Schwensow N, Fietz J, Dausmann KH, Sommer S (2007) Neutral versus adaptive genetic variation in  
663 parasite resistance: importance of major histocompatibility complex supertypes in a free-  
664 ranging primate. *Heredity* **99**, 265-277.
- 665 Sebastian A, Herdegen M, Migalska M, Radwan J (2016) AMPLISAS: a web server for multilocus  
666 genotyping using next-generation amplicon sequencing data. *Molecular Ecology Resources* **16**,  
667 498-510.
- 668 Siddle HV, Marzec J, Cheng Y, Jones M, Belov K (2010) MHC gene copy number variation in Tasmanian  
669 devils: implications for the spread of a contagious cancer. *Proceedings Of The Royal Society B-  
670 Biological Sciences* **277**, 2001-2006.
- 671 Sinigaglia F, Guttinger M, Kilgus J, *et al.* (1988) A malaria T-cell epitope recognized in association with  
672 most mouse and human MHC class II molecules. *Nature* **336**, 778-780.
- 673 Slade RW, McCallum HI (1992) Overdominant vs. frequency-dependent selection at MHC loci.  
674 *Genetics* **132**, 861-864.
- 675 Spurgin LG, Richardson DS (2010) How pathogens drive genetic diversity: MHC, mechanisms and  
676 misunderstandings. *Proceedings of the Royal Society B: Biological Sciences* **277**, 979-988.
- 677 Stuart YE, Veen T, Weber JN, *et al.* (In review) Environmental explanation for semi-parallel evolution.  
678 *Nature Ecology and Evolution*.
- 679 Stutz WE, Bolnick DI (2014) A Stepwise Threshold Clustering (STC) method to infer genotypes from  
680 error-prone next-generation sequencing of multi-allele genes such as the Major  
681 Histocompatibility Complex (MHC). *PLoS ONE*.
- 682 Sutton JT, Nakagawa S, Robertson BC, Jamieson IG (2011) Disentangling the roles of natural selection  
683 and genetic drift in shaping variation at MHC immunity genes. *Molecular Ecology* **20**, 4408-  
684 4420.
- 685 Takahata N, Nei M (1990) Allelic genealogy under overdominant and frequency-dependent selection  
686 and polymorphism of major histocompatibility complex loci. *Genetics* **124**, 967-978.
- 687 Takahata N, Satta Y, Klein J (1992) Polymorphism and balancing selection at Major Histocompatibility  
688 Complex loci. *Genetics* **130**, 925-938.
- 689 Thursz MR, Kwiatkowski D, Allsopp CE, *et al.* (1995) Association between an MHC class II allele and

690 clearance of hepatitis B virus in the Gambia. *New England Journal of Medicine* **332**, 1065-  
691 1069.

692 Tobler M, Plath M, Riesch R, *et al.* (2014) Selection from parasites favours immunogenetic diversity  
693 but not divergence among locally adapted host populations. *Journal of Evolutionary Biology*  
694 **27**, 960-974.

695 Warrens MJ (2008) On association coefficients for 2x2 tables and properties that do not depend on  
696 the marginal distributions. *Psychometrika* **73**, 777-789.

697 Weber J, Bradburd GS, Stuart YE, Stutz WE, Bolnick DI (2017) The relative contributions of distance,  
698 landscape resistance, and habitat, to genomic divergence between parapatric lake and stream  
699 stickleback. *Evolution* **Online Early**.

700 Wedekind C, Walker M, Little TJ (2006) The separate and combined effects of MHC genotype,  
701 parasite clone, and host gender on the course of malaria in mice. *BMC Genetics* **7**, 55.

702 Wegner K, Kalbe M, Schaschl H, Reusch T (2004) Parasites and individual major histocompatibility  
703 complex diversity?an optimal choice? *Microbes and Infection* **6**, 1110-1116.

704 Wegner KM, Kalbe M, Kurtz J, Reusch TBH, Milinski M (2003) Parasite selection for immunogenetic  
705 optimality. *Science* **301**, 1343.

706 Wegner KM, Kalbe M, Milinski M, Reusch TB (2008) Mortality selection during the 2003 European  
707 heat wave in three-spined sticklebacks: effects of parasites and MHC genotype. *BMC*  
708 *Evolutionary Biology* **8**, 124.

709 Westerdahl H, Asghar M, Hasselquist D, Bensch S (2012) Quantitative disease resistance: to better  
710 understand parasite-mediated selection on major histocompatibility complex. *Proceedings of*  
711 *the Royal Society of London B: Biological Sciences* **279**, 577-584.

712 Yasukochi Y, Satta Y (2013) Current perspectives on the intensity of natural selection of MHC loci.  
713 *Immunogenetics* **65**, 479-483.  
714



**Data Accessibility:** Data required to reproduce the analyses presented in this paper will be made publically available at the time of publication. 454 amplicon sequencing reads have been uploaded to \_\_\_\_\_. Tables of allele presence/absence from these 454 amplicon sequences will be uploaded to Dryad doi: \_\_\_\_\_. Tables of parasite infections and fish ecomorphology and sex will be uploaded to Dryad at doi: \_\_\_\_\_, along with meta-data linking individual fish to their MHC genotype and sampling location.

**Author contributions:** WES and DIB collaboratively planned the data collection and analysis. WES conducted the field work, lab work, sequencing, bioinformatics. The statistical analyses were conducted primarily by WES with contributions from DIB. WES and DIB wrote the manuscript together.

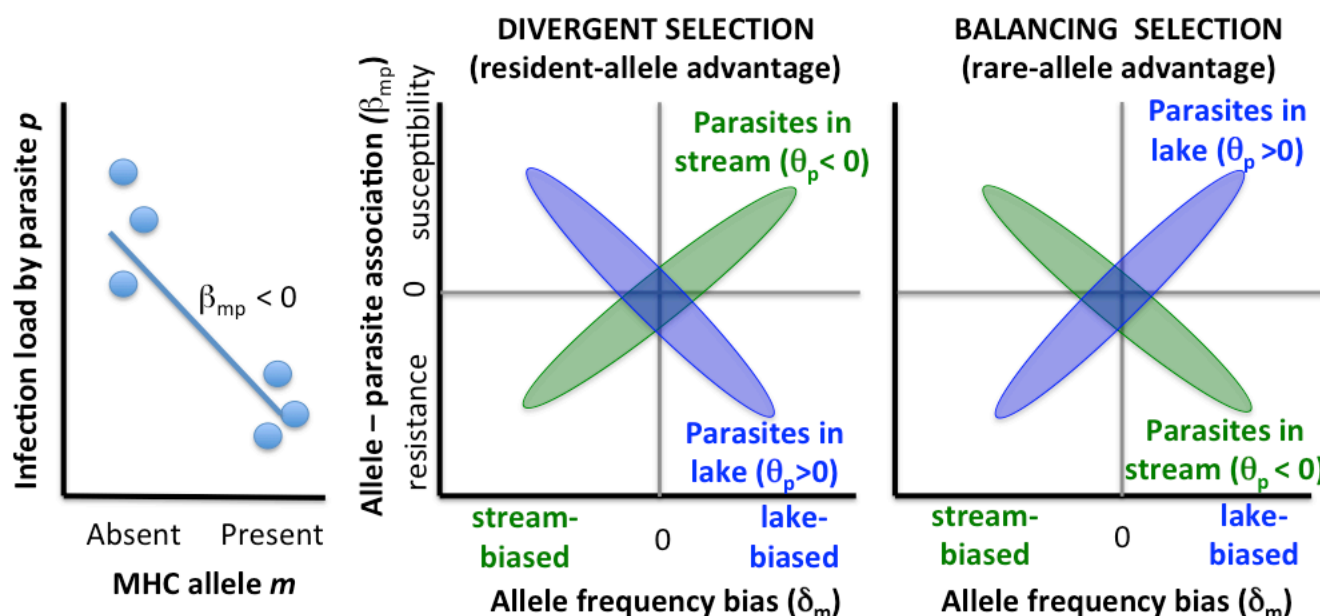

**Figure 1. A conceptual diagram illustrating our strategy to test for a predominant effect of divergent**

**selection between populations, versus balancing selection within populations.** We calculate an effect size and direction ( $\beta_{mp}$ ) for all pairwise associations between MHC allele  $m$  versus parasite taxon  $p$ , within a given habitat (lake or stream). Then, we test whether  $\beta_{mp}$  depends on the extent to which allele  $m$  is lake- or stream-biased ( $\delta_m$ ), and the parasite is lake- or stream-biased ( $\theta_p$ ). We expect that  $\beta_{mp}$  covaries with  $\delta_m$ , but the sign of this trend is opposite within the lake versus stream samples. With divergent selection, each population will contain locally common alleles that confer protection against locally common parasites, whereas immigrants will tend to be susceptible to unfamiliar parasites. For example, alleles that are particularly common in the lake ( $\delta_m > 0$ ) should confer protection ( $\beta_{mp} < 0$ ) against lake-specific parasites ( $\theta_p > 0$ ), but susceptibility ( $\beta_{mp} > 0$ ) against parasites in the stream ( $\theta_p < 0$ ). In contrast, balancing selection favors rare alleles, so immigrant alleles should benefit. Stream-biased MHC alleles ( $\delta_m < 0$ ) that migrate into the neighboring lake should be rare and confer resistance ( $\beta_{mp} < 0$ ) to lake-specific parasites ( $\theta_p > 0$ ). Therefore, both divergent and balancing selection should produce a  $\theta_p * \delta_m$  interaction effect on  $\beta_{mp}$ , but the direction of this interaction depends on the form of selection.



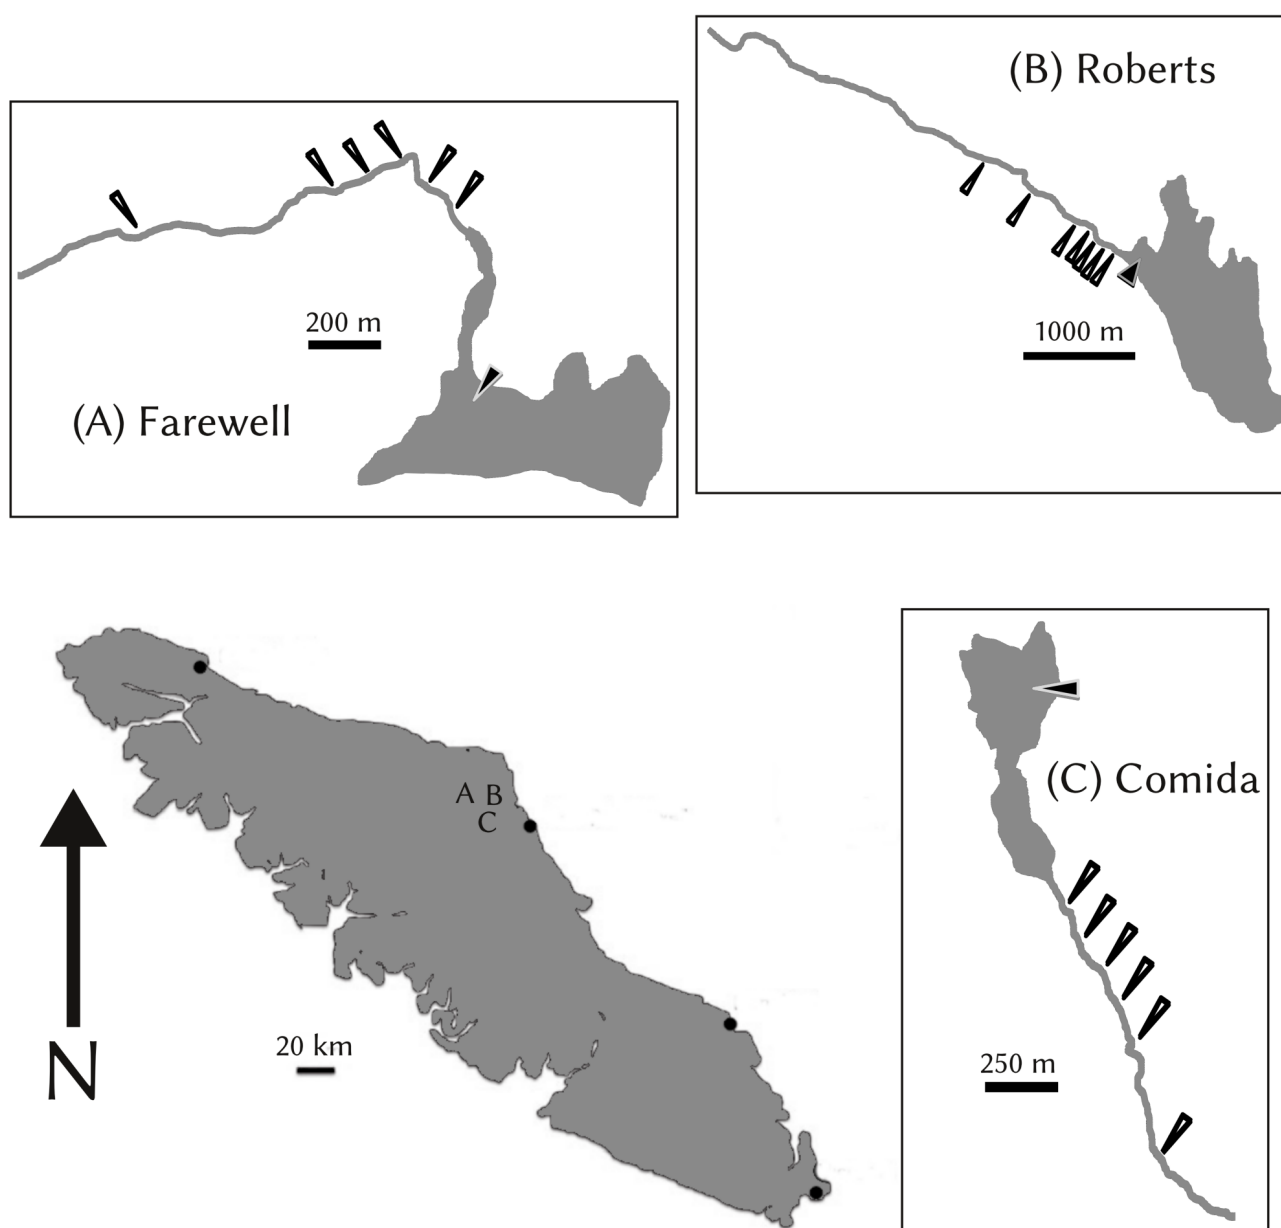

**Figure 2. Map of study system showing Vancouver Island and the three lake-stream pairs used in this study.**

Approximate locations of each lake-stream pair on the island are indicated by their respective letters (A:

Farewell, B: Roberts, C: Comida). Arrows indicate separate sampling locations within each pair. Separate scale

bars are provided for the entire island and each pair individually.

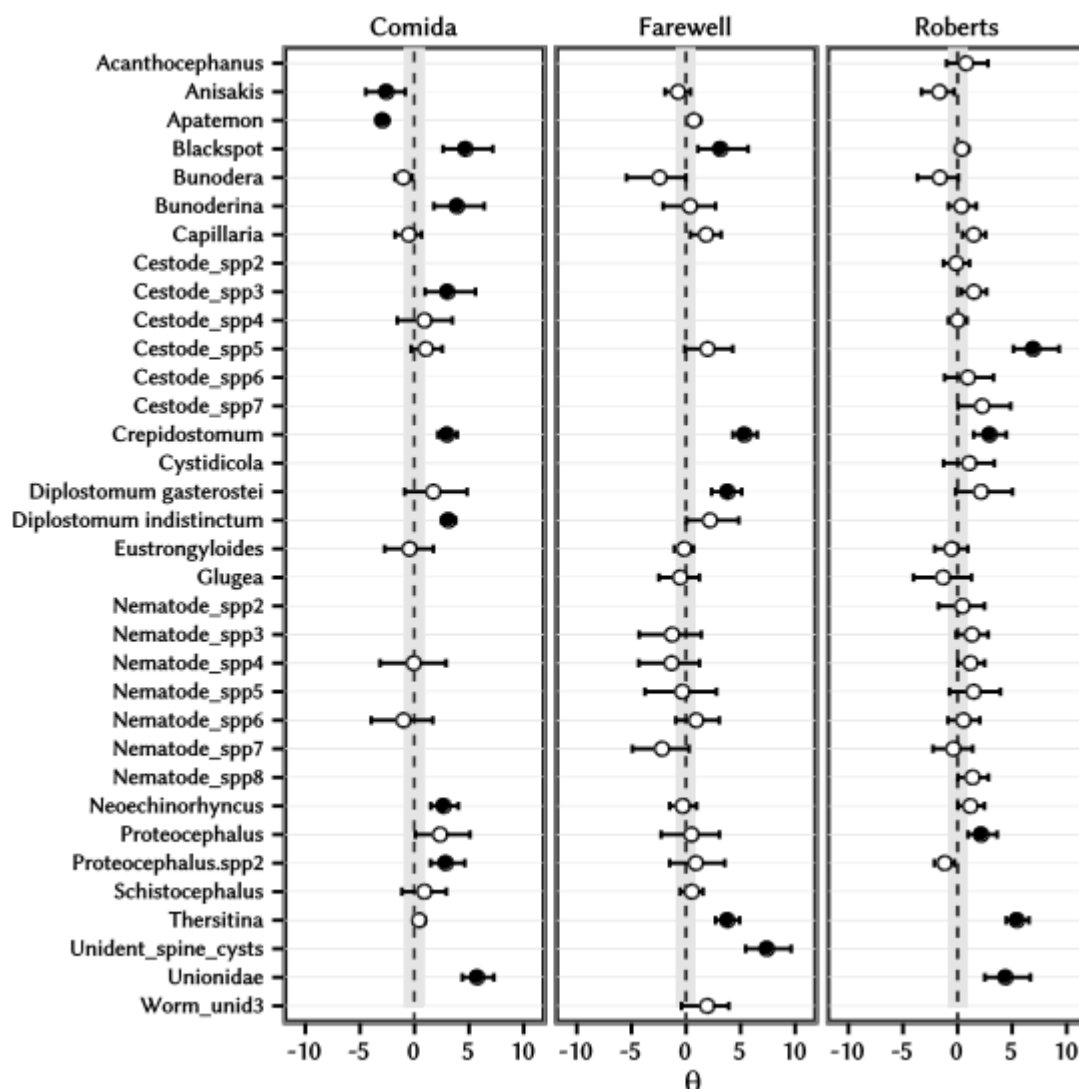

**Figure 3. Posterior distributions of parasite prevalence differences between habitats ( $\theta_p$ ) for each parasite within each for lake-stream pair indicate which parasites are habitat specific.** Positive values of  $\theta_p$  indicate lake-biased parasites, while negative values indicate stream bias. Note  $\theta_p$  is calculated on a logarithmic scale. Posterior means are indicated by circles while the bars indicate 95% credible intervals. Credible intervals must fall completely above or below the gray band in each panel to meet our criterion of regarding parasites as habitat-specific (a high probability of being at least twice as abundant in one habitat than in the other). Filled circles indicate habitat-specific parasites.

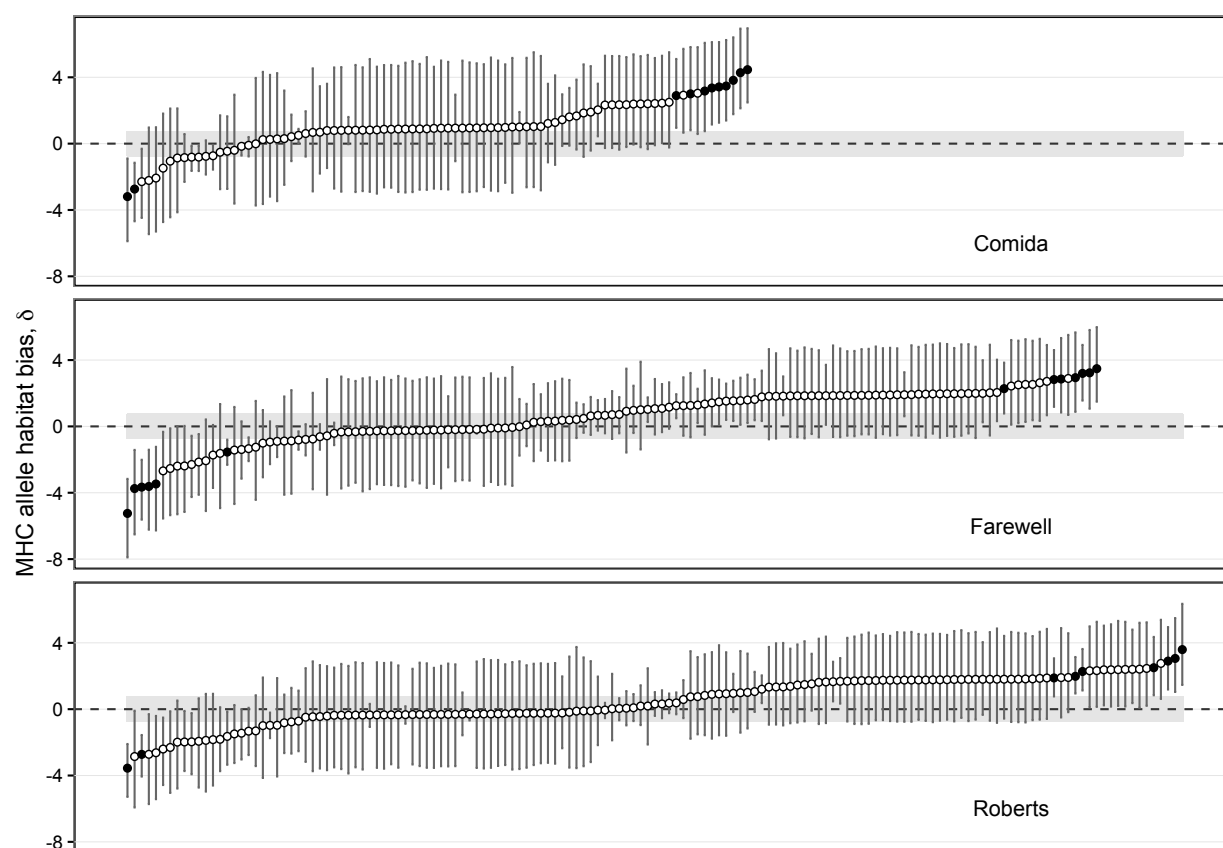

**Figure 4. Posterior distributions of MHC II $\beta$  allele differences between habitats ( $\delta_m$ ) within each lake-stream pair.** Positive values of  $\delta_m$  indicate lake-biased alleles, while negative values indicate stream-biased alleles. Note that  $\delta_m$  is calculated on a logarithmic (non-linear) scale. Posterior means are indicated by circles while the bars indicate 90% credible intervals. Credible intervals must fall complete above or below the gray band in each panel to indicate alleles with high probability of occurring twice as frequently in one habitat compared to the other. Habitat-specific alleles are indicated by filled circles and are labeled. Alleles are ordered along the x axis by increasing values of  $\delta_m$ . Note that few alleles are shared between the three lake-stream pairs.

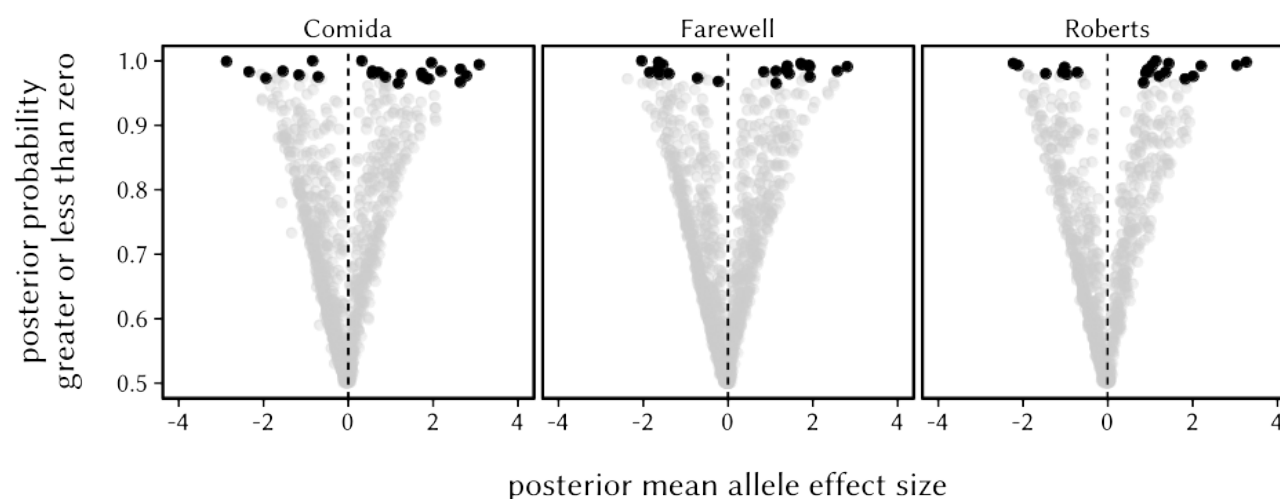

**Figure 5. Volcano plot comparing the posterior mean effect sizes versus posterior probability of all MHC**

**allele-parasite associations ( $\beta_{mp}$ ).** Each point represents a single estimated effect of  $\beta_{mp}$ , calculated for a given

lake-stream pair. The y-axis shows the proportion of the posterior distribution greater than zero (for positive effects) or less than zero (for negative effects). Effect sizes are given on the latent (i.e. natural log) data scale.

Black circles indicated effects with 95% HPD intervals that do not include zero.

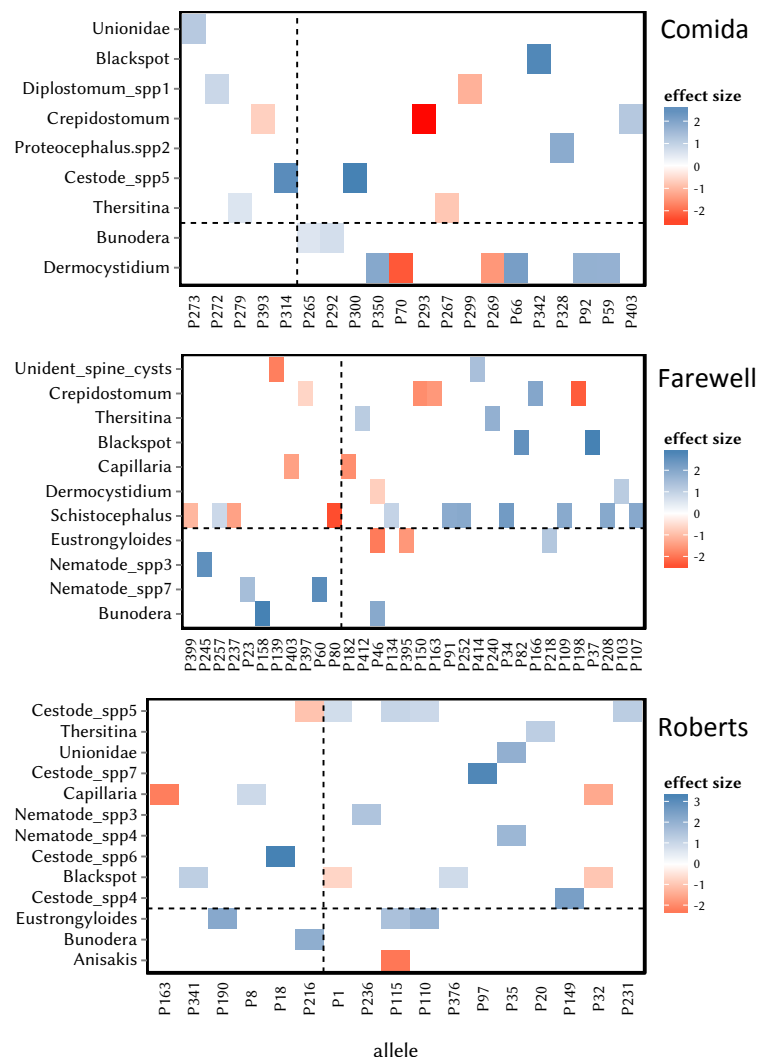

**Figure 6. Heatmap of associations ( $\beta_{mp}$ ) between MHC alleles (x-axis) and parasite taxa (y-axis).** We only plot associations whose 95% HPD intervals do not include zero (black circles from Fig. 5). Blue squares represent positive effects (alleles associated with higher parasite load), red represent negative effects (alleles conferring lower parasite load). We plot each lake-stream pair separately (Comida at the top, then Farewell, then Roberts). Within each pair, alleles to the right of the vertical dashed line are more common in the lake ( $\delta_m > 0$ ), alleles to the left are more common in the stream ( $\delta_m < 0$ ). Parasites above the horizontal dashed line are more common in the lake ( $\theta_p > 0$ ), parasites below the line are more common in the stream ( $\theta_p < 0$ ). Examples of allele-parasite associations are plotted in the Supplementary Figures.

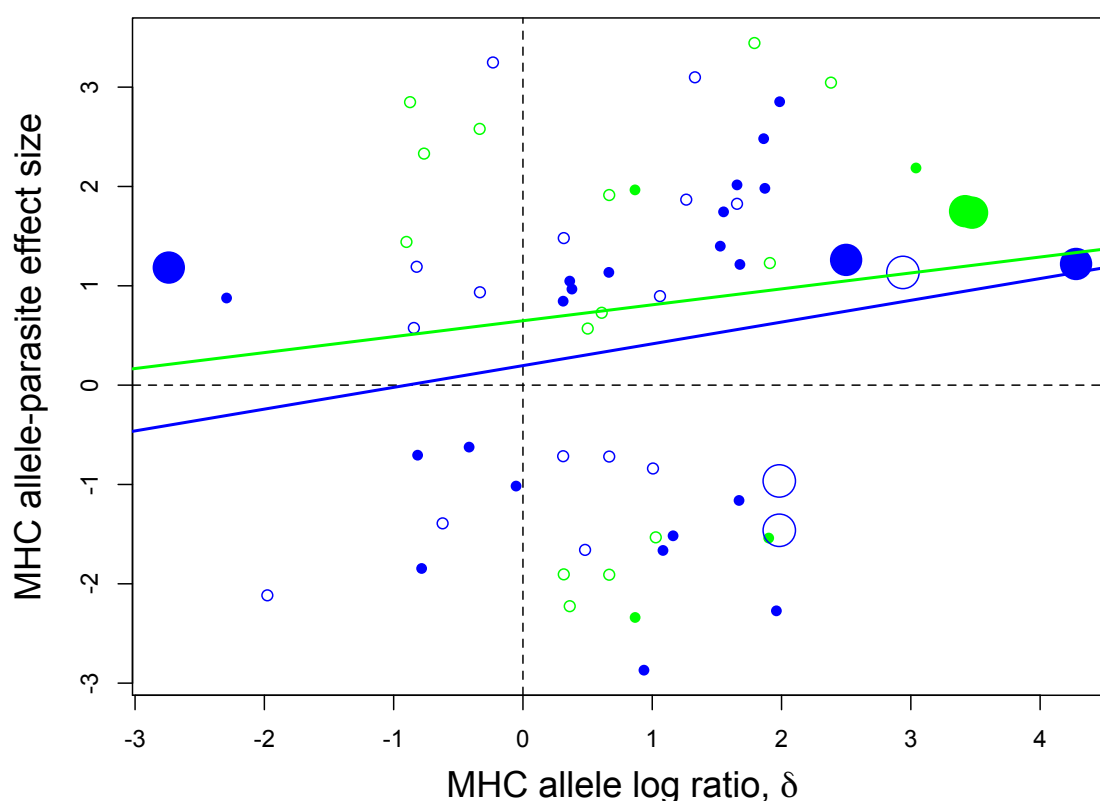

**Figure 7. An empirical test of local adaptation versus balancing selection**, as illustrated in our conceptual diagram (Fig. 1). We plot MHC allele effect size on parasites ( $\beta_{mp}$ ; positive values imply susceptibility, negative values imply resistance) as a function of the alleles' relative abundance in the lake or stream ( $\delta_m$ ; positive values imply higher frequency in the lake, and negative values imply higher frequency in the stream). Each point represents a non-zero association between an MHC allele and a parasite taxon (95% HPD intervals of  $\beta_{mp}$  do not include zero; black circles from Fig. 4). We plot separate regression lines for parasites that tend to be more common in the lake (blue,  $\theta_p > 0$ ) versus stream (green;  $\theta_p < 0$ ), because we predicted their slopes would have opposite signs. Habitat-specific parasites (strong frequency bias) are indicated by filled points. Habitat-specific alleles are indicated by larger points. We combine all three lake-stream pairs in this plot, because different alleles were involved in parasite susceptibility or resistance in each pair.

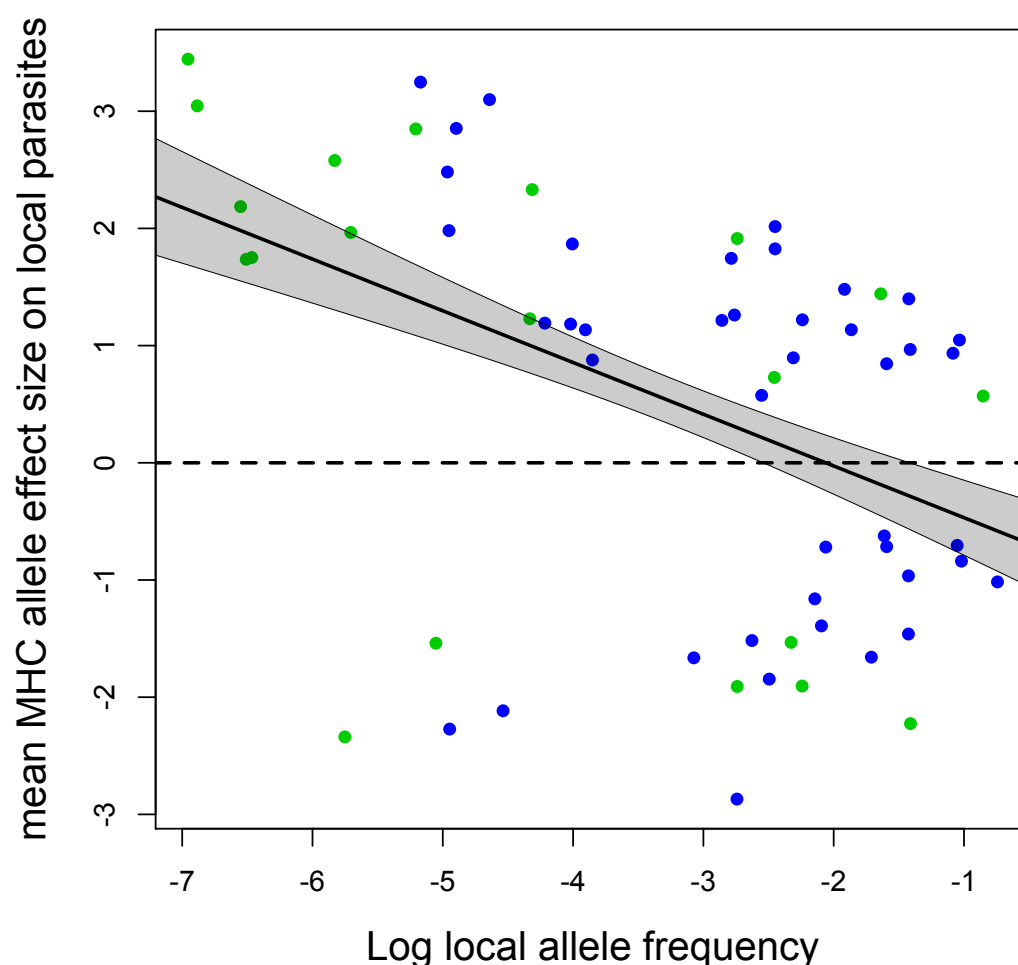

**Figure 8. Locally rare alleles tend, on average, to confer susceptibility to local parasites (positive allele-parasite associations), whereas common alleles tend to be about equally likely to confer resistance or susceptibility.** Allele frequency is calculated as the  $\log_2$  of the fraction of individuals carrying the allele. Each point is an allele in a particular habitat in a lake-stream pair. For each allele, we calculated its average effect size ( $\beta_m$ ) across all present parasites. Only those alleles with at least some significant parasite associations are included.

SUPPORTING INFORMATION

748

749 **Table S1. Sampling locations and sample sizes.** Columns give distances downstream from lake (in meters) where fish were sampled. Cells indicate the  
750 total number of fish sampled at each sampling distance. Not all fish were screened for parasites or genotyped.

|          | Lake location      | Stream sites (distance downstream from lake, m) |    |    |    |     |     |     |     |     |     |     |      |      |              |  |
|----------|--------------------|-------------------------------------------------|----|----|----|-----|-----|-----|-----|-----|-----|-----|------|------|--------------|--|
| Pair     | Latitude/Longitude | Lake                                            | 20 | 25 | 50 | 100 | 150 | 200 | 250 | 300 | 400 | 500 | 1000 | 1500 | stream total |  |
| Comida   | 50.1443, -125.5283 | 81                                              | 0  | 0  | 14 | 20  | 21  | 20  | 20  | 19  | 20  | 20  | 20   | 20   | 194          |  |
| Farewell | 50.2010, -125.5860 | 126                                             | 0  | 0  | 0  | 13  | 0   | 50  | 0   | 48  | 50  | 50  | 50   | 0    | 261          |  |
| Roberts  | 50.2266, -125.5530 | 138                                             | 1  | 1  | 0  | 43  | 4   | 48  | 47  | 49  | 28  | 18  | 50   | 70   | 359          |  |

751



752 **Table S2. Sample sizes by data available.** Cells indicate the total number of fish at each site for which each type data was collected

753 (dissected=measured and screened for parasites, genotyped=genotyped at MHC loci).

|                 | Parasite screening | MHC genotyping | both |
|-----------------|--------------------|----------------|------|
| Comida Lake     | 81                 | 42             | 42   |
| Comida Stream   | 190                | 138            | 136  |
| Farewell Lake   | 121                | 102            | 97   |
| Farewell Stream | 258                | 211            | 209  |
| Roberts Lake    | 137                | 119            | 118  |
| Roberts Stream  | 333                | 234            | 216  |

754

755

756

757 **Table S3. Percentage of estimated allele effects that were positive and negative.** Numbers in parentheses give the percentage of estimated effects  
758 that were non-zero effects. P-values are derived from exact binomial tests that negative and positive effects were equally likely within each pair (p-  
759 value in parenthesis gives the result for tests for just non-zero effects).

760

| Lake-<br>stream<br>pair | Number of<br>allele-<br>parasite<br>associations<br>tested |       | % negative<br>effects | # positive<br>effects | P-value | % non-zero<br>negative<br>effects | % non-zero<br>positive<br>effects | P-value    |
|-------------------------|------------------------------------------------------------|-------|-----------------------|-----------------------|---------|-----------------------------------|-----------------------------------|------------|
|                         |                                                            |       |                       |                       |         |                                   |                                   |            |
|                         |                                                            |       |                       |                       |         |                                   |                                   |            |
|                         |                                                            |       |                       |                       |         |                                   |                                   |            |
|                         |                                                            |       |                       |                       |         |                                   |                                   | 0.11531829 |
| Comida                  | 1653                                                       | 0.727 | 0.272                 | 3.50E-79              | 0.0036  | 0.0085                            | 8                                 |            |
|                         |                                                            |       |                       |                       |         |                                   |                                   | 0.22948101 |
| Farewell                | 2362                                                       | 0.708 | 0.292                 | 1.00E-93              | 0.0055  | 0.00891                           | 3                                 |            |
|                         |                                                            |       |                       |                       |         |                                   |                                   | 0.02411954 |
| Roberts                 | 2669                                                       | 0.739 | 0.261                 | 8.33E-140             | 0.0030  | 0.0079                            | 5                                 |            |

761

762

763 **Table S4. Estimated non-zero effects.** Habitat specific parasite and alleles are indicated in bold.

764

| pair     | allele m | parasite p          | $\beta_{mp}$ | 95% HPDI |       | Habitat Specificity |             |
|----------|----------|---------------------|--------------|----------|-------|---------------------|-------------|
|          |          |                     |              | low      | hi    | parasite            | allele      |
| Comida   | P293     | Crepidostomum       | -2.87        | -5.17    | -0.78 | <b>lake</b>         | none        |
| Farewell | P198     | Crepidostomum       | -2.27        | -4.88    | -0.13 | <b>lake</b>         | none        |
| Comida   | P70      | Apatemon            | -2.34        | -4.67    | -0.13 | <b>stream</b>       | none        |
| Roberts  | P236     | Cestode_spp2        | -1.91        | -4.42    | -0.03 | none                | none        |
| Roberts  | P115     | Anisakis            | -2.23        | -4.13    | -0.56 | none                | none        |
| Farewell | P46      | Eustrongyloides     | -1.91        | -3.96    | -0.02 | none                | none        |
| Roberts  | P163     | Capillaria          | -2.12        | -3.92    | -0.23 | none                | none        |
| Farewell | P139     | Unident_spine_cysts | -1.85        | -3.76    | -0.08 | <b>lake</b>         | none        |
| Farewell | P150     | Crepidostomum       | -1.66        | -3.25    | -0.19 | <b>lake</b>         | none        |
| Farewell | P182     | Capillaria          | -1.66        | -3.17    | -0.11 | none                | none        |
| Farewell | P395     | Eustrongyloides     | -1.53        | -3.09    | -0.02 | none                | none        |
| Comida   | P269     | Apatemon            | -1.54        | -2.98    | -0.15 | <b>stream</b>       | none        |
| Farewell | P403     | Capillaria          | -1.39        | -2.94    | -0.16 | none                | none        |
| Roberts  | P32      | Capillaria          | -1.46        | -2.94    | -0.11 | none                | <b>lake</b> |

|          |      |                          |       |       |       |               |               |
|----------|------|--------------------------|-------|-------|-------|---------------|---------------|
| Farewell | P163 | Crepidostomum            | -1.52 | -2.63 | -0.22 | <b>lake</b>   | none          |
| Comida   | P299 | Diplostomum indistinctum | -1.16 | -2.25 | -0.01 | <b>lake</b>   | none          |
| Roberts  | P216 | Cestode_spp5             | -1.02 | -1.97 | -0.24 | <b>lake</b>   | none          |
| Roberts  | P32  | Blackspot                | -0.96 | -1.87 | -0.04 | none          | <b>lake</b>   |
| Farewell | P46  | Apatemon                 | -0.72 | -1.51 | 0.00  | none          | none          |
| Comida   | P393 | Crepidostomum            | -0.71 | -1.46 | -0.03 | <b>lake</b>   | none          |
| Roberts  | P1   | Blackspot                | -0.72 | -1.41 | -0.04 | none          | none          |
| Comida   | P267 | Thersitina               | -0.84 | -1.40 | -0.29 | none          | none          |
| Farewell | P397 | Crepidostomum            | -0.62 | -1.22 | -0.01 | <b>lake</b>   | none          |
| Comida   | P292 | Bunodera                 | 0.73  | 0.01  | 1.37  | none          | none          |
| Farewell | P23  | Nematode_spp7            | 1.44  | 0.02  | 2.93  | none          | none          |
| Roberts  | P1   | Cestode_spp5             | 0.85  | 0.02  | 1.88  | <b>lake</b>   | none          |
| Comida   | P272 | Diplostomum indistinctum | 0.88  | 0.02  | 1.75  | <b>lake</b>   | none          |
| Farewell | P103 | Apatemon                 | 1.14  | 0.02  | 2.47  | none          | <b>lake</b>   |
| Comida   | P265 | Bunodera                 | 0.57  | 0.02  | 1.17  | none          | none          |
| Roberts  | P341 | Blackspot                | 1.19  | 0.03  | 2.21  | none          | none          |
| Comida   | P273 | Unionidae                | 1.18  | 0.03  | 2.58  | <b>lake</b>   | <b>stream</b> |
| Comida   | P59  | Apatemon                 | 1.74  | 0.04  | 3.54  | <b>stream</b> | <b>lake</b>   |

|          |      |                     |      |      |      |               |             |
|----------|------|---------------------|------|------|------|---------------|-------------|
| Farewell | P412 | Thersitina          | 1.14 | 0.04 | 2.14 | <b>lake</b>   | none        |
| Roberts  | P20  | Thersitina          | 1.22 | 0.04 | 2.48 | <b>lake</b>   | none        |
| Roberts  | P35  | Nematode_spp4       | 1.83 | 0.05 | 3.48 | none          | none        |
| Comida   | P279 | Thersitina          | 0.58 | 0.05 | 1.11 | none          | none        |
| Comida   | P403 | Crepidostomum       | 1.22 | 0.06 | 2.52 | <b>lake</b>   | <b>lake</b> |
| Roberts  | P8   | Capillaria          | 0.94 | 0.07 | 1.77 | none          | none        |
| Roberts  | P236 | Nematode_spp3       | 1.48 | 0.08 | 2.85 | none          | none        |
| Farewell | P82  | Blackspot           | 2.48 | 0.09 | 5.07 | <b>lake</b>   | none        |
| Roberts  | P376 | Blackspot           | 0.90 | 0.09 | 1.79 | none          | none        |
| Farewell | P60  | Nematode_spp7       | 2.58 | 0.09 | 4.84 | none          | none        |
| Roberts  | P110 | Cestode_spp5        | 0.97 | 0.10 | 1.87 | <b>lake</b>   | none        |
| Farewell | P218 | Eustrongyloides     | 1.23 | 0.10 | 2.24 | none          | none        |
| Comida   | P92  | Apatemon            | 1.75 | 0.10 | 3.46 | <b>stream</b> | <b>lake</b> |
| Roberts  | P231 | Cestode_spp5        | 1.26 | 0.10 | 2.67 | <b>lake</b>   | <b>lake</b> |
| Farewell | P166 | Crepidostomum       | 1.98 | 0.15 | 3.98 | <b>lake</b>   | none        |
| Roberts  | P35  | Unionidae           | 2.02 | 0.16 | 4.02 | <b>lake</b>   | none        |
| Roberts  | P115 | Cestode_spp5        | 1.05 | 0.16 | 1.88 | <b>lake</b>   | none        |
| Farewell | P414 | Unident_spine_cysts | 1.40 | 0.17 | 2.55 | <b>lake</b>   | none        |

|          |      |                 |      |      |      |               |      |
|----------|------|-----------------|------|------|------|---------------|------|
| Comida   | P66  | Apatemon        | 2.19 | 0.30 | 4.22 | <b>stream</b> | none |
| Farewell | P37  | Blackspot       | 2.85 | 0.34 | 4.86 | <b>lake</b>   | none |
| Farewell | P240 | Thersitina      | 1.74 | 0.36 | 3.02 | <b>lake</b>   | none |
| Farewell | P46  | Bunodera        | 1.91 | 0.37 | 3.62 | none          | none |
| Farewell | P91  | Schistocephalus | 1.87 | 0.39 | 3.23 | none          | none |
| Farewell | P158 | Bunodera        | 2.85 | 0.47 | 5.04 | none          | none |
| Roberts  | P190 | Cestode_spp2    | 2.33 | 0.51 | 3.91 | none          | none |
| Comida   | P350 | Apatemon        | 1.97 | 0.53 | 3.52 | <b>stream</b> | none |
| Roberts  | P97  | Cestode_spp7    | 3.10 | 0.67 | 5.53 | none          | none |
| Roberts  | P123 | Cestode_spp2    | 3.05 | 0.78 | 5.07 | none          | none |
| Roberts  | P155 | Cestode_spp2    | 3.44 | 1.17 | 5.62 | none          | none |
| Roberts  | P18  | Cestode_spp6    | 3.25 | 1.22 | 5.40 | none          | none |

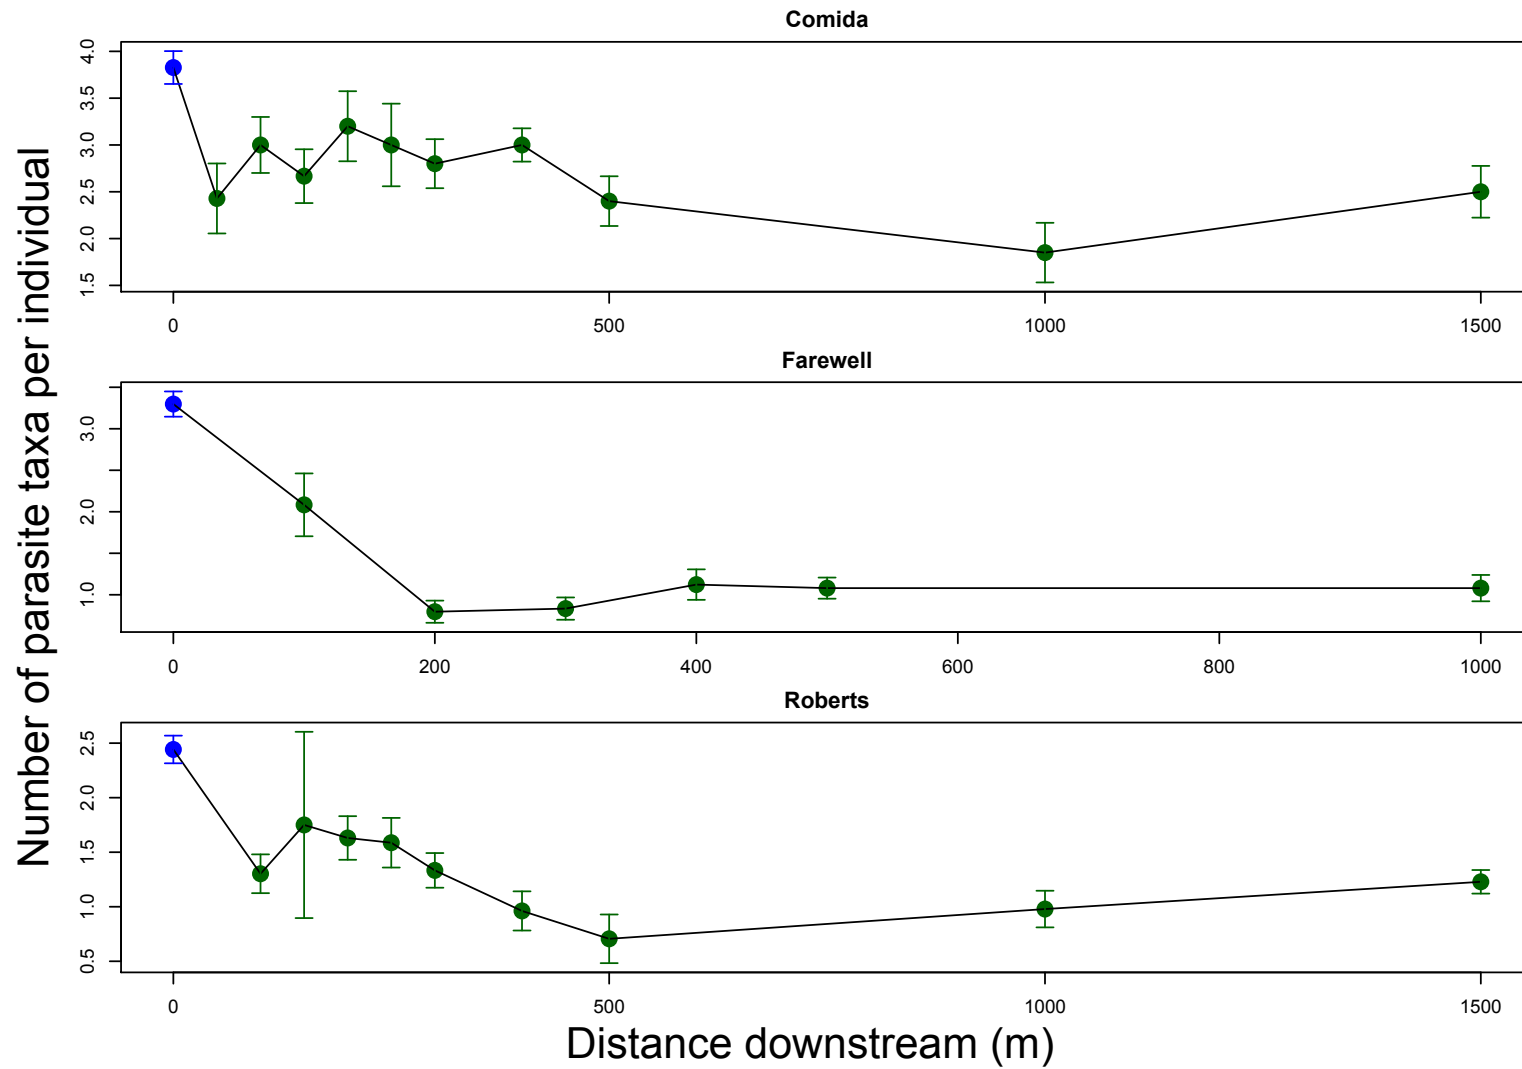

766

767 **Fig. S1.** In all three lake-stream clines, stream stickleback carried a lower parasite richness than did their neighboring stream stickleback (all  $P < 0.0001$ ),

768 with no significant effect of distance within the stream (all  $P > 0.05$ ).

769

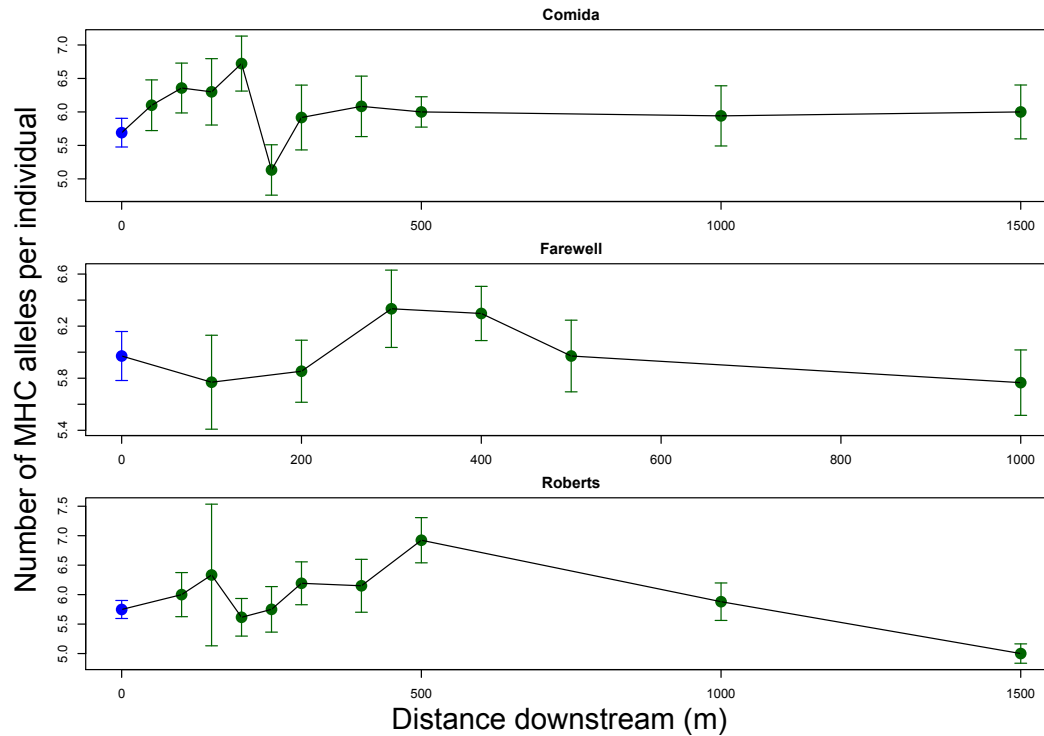

770

771 **Figure S2.** MHC allelic diversity (operationally defined here as the number of unique amino acid sequences per individual fish) varies across lake-stream  
 772 clines. In the Comida and Farewell pairs, there is no significant effect of habitat, distance, nor a quadratic distance effect (ANCOVA; Comida:  $P=0.172$ ,  
 773  $0.433$ , and  $0.785$  respectively; Farewell  $P=0.832$ ,  $0.724$ ,  $0.128$ ). In Roberts Lake, however, there is a significant effect of distance, including both a linear  
 774 and a negative quadratic trend ( $P=0.0065$  and  $0.0201$ ) but no effect of habitat ( $P=0.9373$ ). In all three pairs, the greatest per-fish MHC diversity occurs  
 775 in the stream, midway along the transect. This transitory increase in diversity is consistent with the proposed diversity-increasing effect of migration.  
 776 Combining the three lake-stream pairs into a single ANOVA analysis, we find a significant effect of distance ( $P=0.0006$ ) and marginal quadratic effect  
 777 ( $P=0.091$ ) on MHC diversity, but no effect of pair ( $P=0.118$ ) or habitat ( $P=0.497$ ). This result stands in contrast to other stickleback lake-stream pairs, in  
 778 which stream fish consistently exhibit lower MHC diversity than lake fish (Eizaguirre *et al.* 2012a; Eizaguirre *et al.* 2010; Feulner *et al.* 2015).



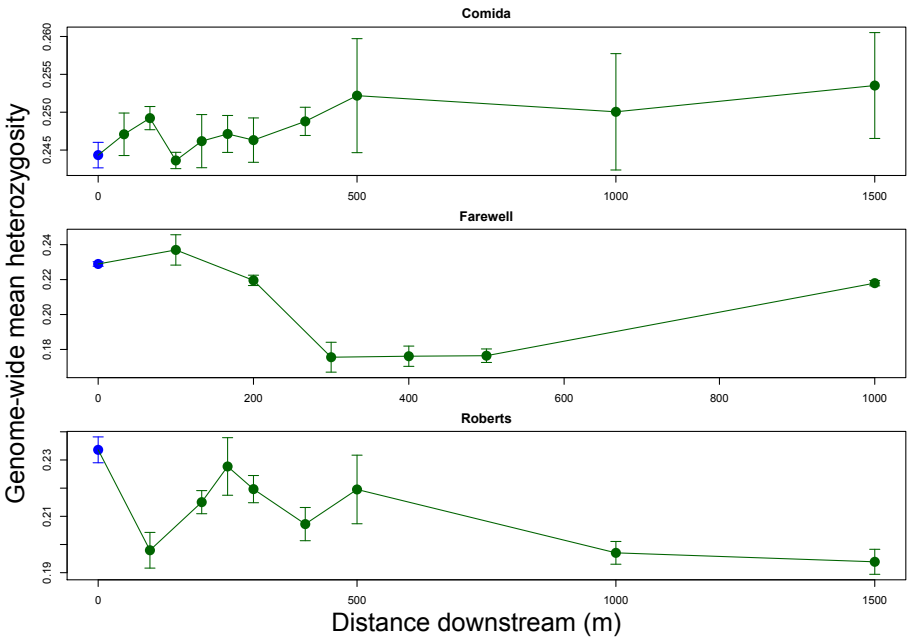

781 **Figure S3.** For comparison with Fig. S2, we here show the genomic SNP diversity (operationally defined here as the average heterozygosity across all  
782 scored SNPs) across lake-stream clines. In Comida Lake there is a weakly significant trend towards higher diversity farther downstream ( $P=0.034$ ), and a  
783 very marginal difference between the habitats ( $P=0.095$ ), but in an ANCOVA analysis with both effects, neither is significant. Farewell exhibits  
784 significant among-site variation in heterozygosity, driven by lower heterozygosity in the stream than in the lake ( $P<0.00001$ ) and a quadratic effect of  
785 distance downstream ( $P<0.00001$ ). Likewise, Roberts Lake exhibits lower heterozygosity in the stream than lake ( $P<0.00008$ ) and decreasing  
786 heterozygosity with distance downstream ( $P=0.00315$ ). Unlike the trend for MHC, genome-wide data shows no consistent tendency for genetic  
787 diversity to be elevated a short distance downstream. This suggests that the diversity-sustaining effect of migration might disproportionately impact  
788 MHC II sequences. That said, this comparison is only qualitative, because of the polygenic nature of MHC II $\beta$  genotypes in this study.

789

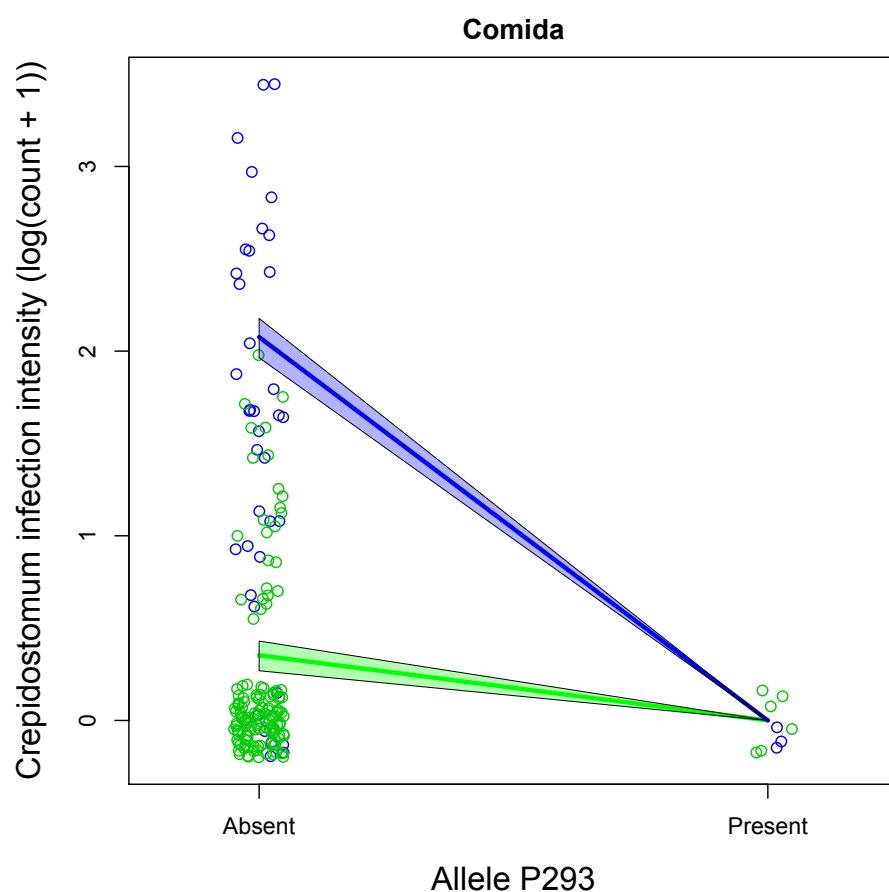

790

791 **Fig. S4.** An example of a significant negative MHC allele-parasite association. *Crepidostomum* sp. infection  
792 intensity is lower in Comida fish carrying allele P293, than in fish without. This trend is supported overall, but is  
793 stronger for lake fish (shown in blue) than stream fish (green).

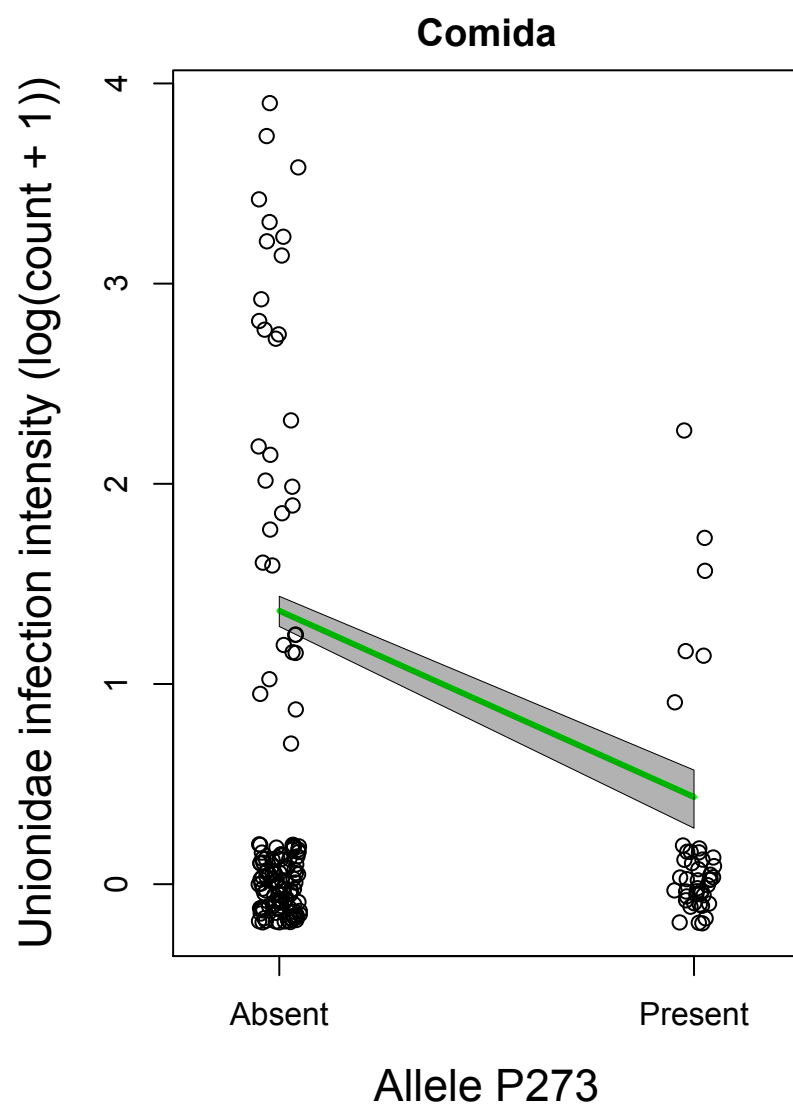

794

795 **Fig. S5.** An example of a significant negative MHC allele-parasite association. Unionidae infection intensity is  
 796 lower in Comida fish carrying allele P273, than in fish without. This trend is independent of fish habitat.

797

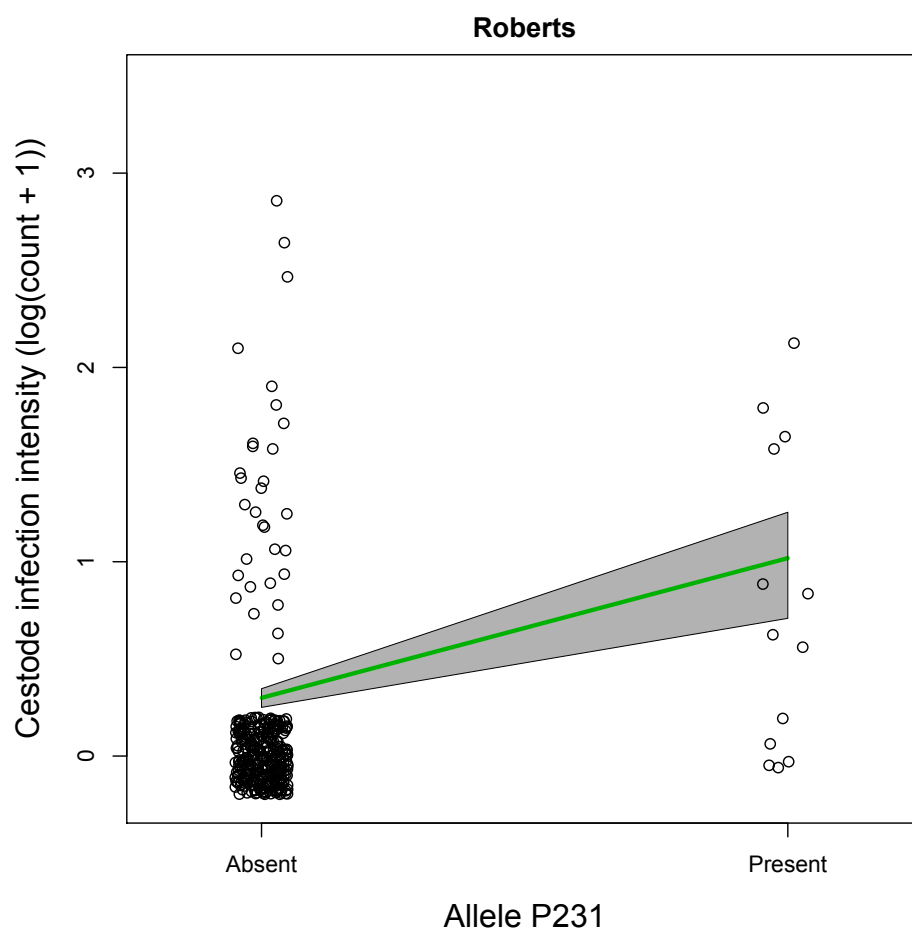

798

799 **Fig. S6.** An example of a significant positive MHC allele-parasite association. Cestode spp infection intensity is  
800 higher in Roberts fish carrying allele P231, than in fish without.

801

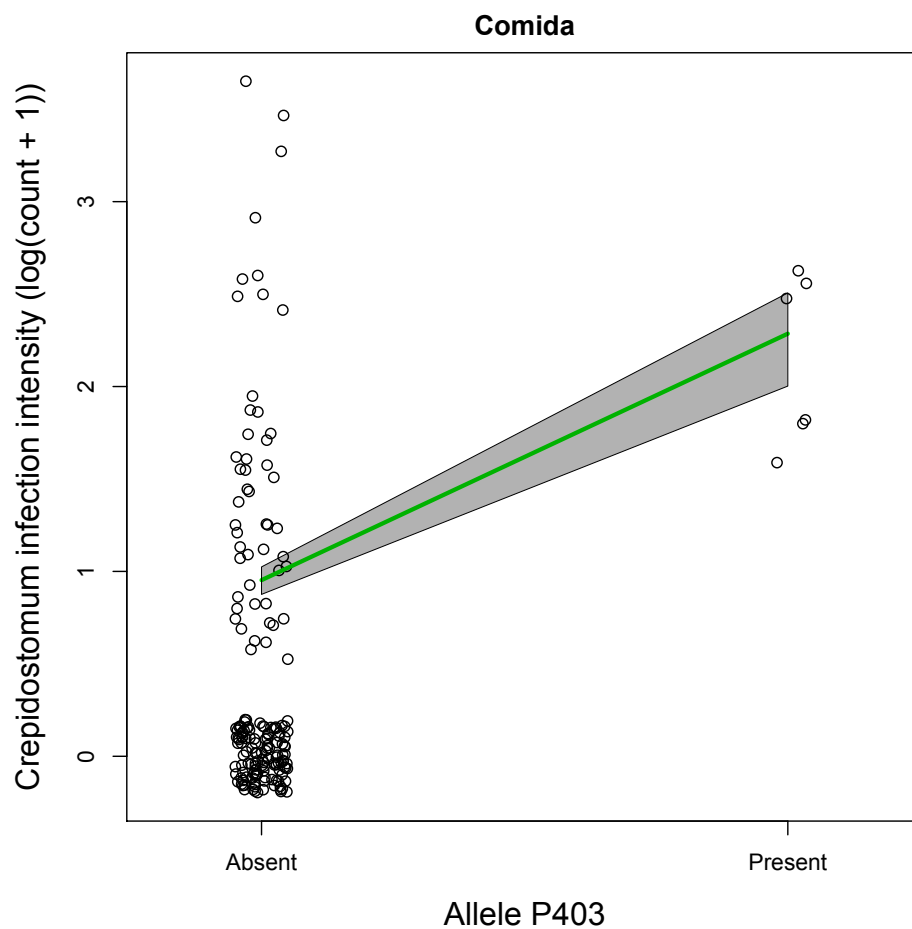

802

803 **Fig. S7.** An example of a significant positive MHC allele-parasite association. Crepidostomum infection intensity  
804 is higher in Comida fish carrying allele P403, than in fish without. This trend is largely independent of the effect  
805 plotted in Fig. S4 for the same parasite and the same lake-stream pair, because the allele P403 shown here  
806 segregates independently of allele P293.

807

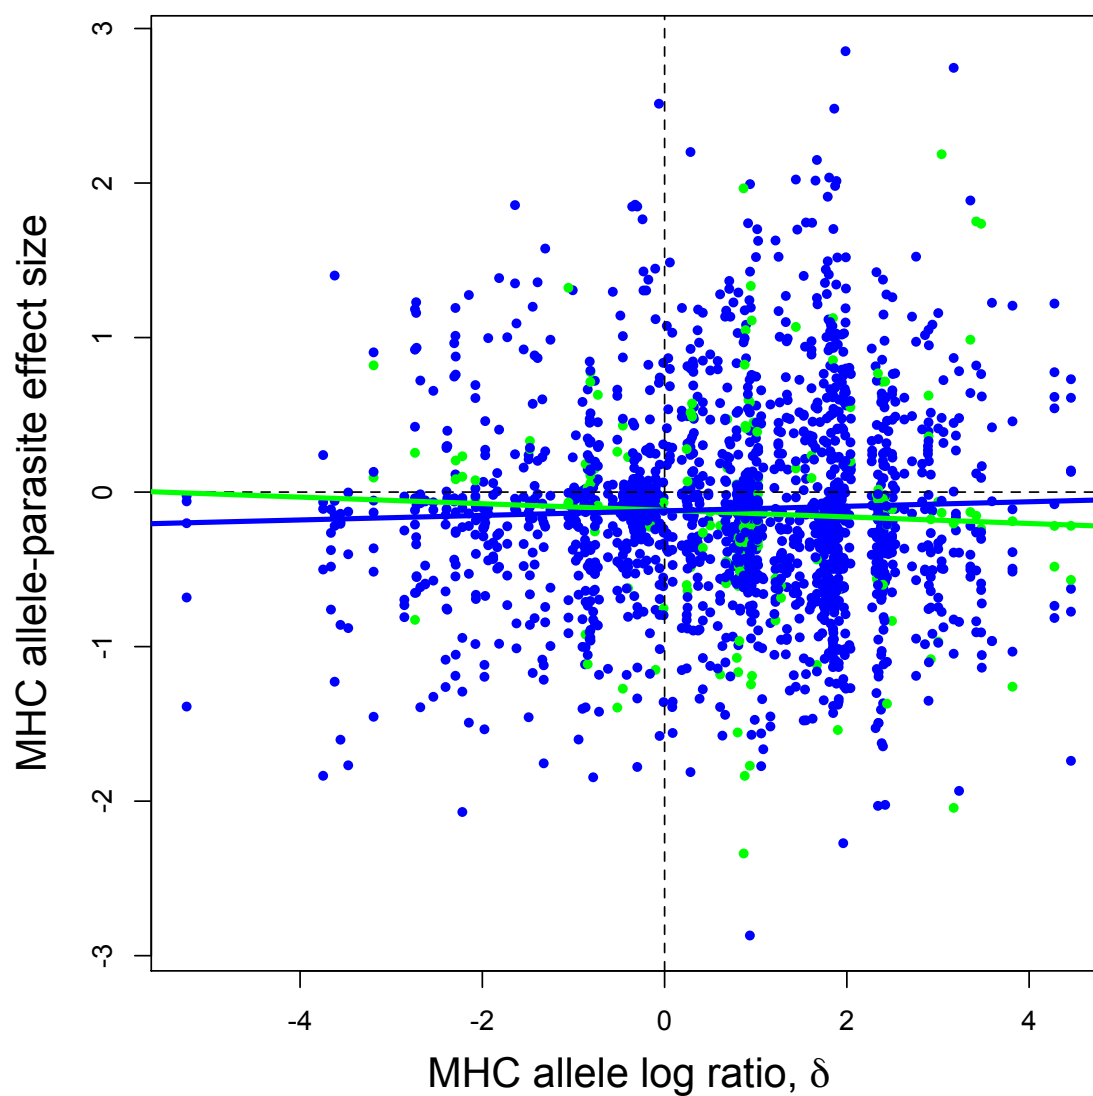

**Figure S8.** The same plot as in Fig. 7 in the main text, but for all allele-parasite associations tested, rather than just the strongly habitat-biased parasites, or strongly habitat-biased alleles.

## Supplemental Methods:

### 809 *Accounting for allele co-occurrence*

810 Given that MHC II-B exists as multiple paralog loci, alleles can be co-inherited as haplotype blocks, resulting in  
 811 linkage disequilibrium between different alleles. Because alleles may be co-inherited, it could be difficult to  
 812 determine which of two (or more) linked alleles are responsible for variation in infections. We therefore  
 813 calculated Yule's Q (Warrens 2008) as a measure of association between all pairs of alleles within a  
 814 lake/stream pair, using *Yule* function in the *psych* package in R 3.2.1 (Revelle 2016). Like Pearson correlation  
 815 coefficients, Q ranges from -1 to 1 and indicates the degree of positive or negative association between two  
 816 binary variables (e.g. allele presence). This metric was used to determine which alleles co-occurred strongly.

### 817 *Yule's Q results*

818 Of the 27,406 pairwise comparisons of alleles, only 1702 pairs of alleles (6%) had a value of Yule's Q greater  
 819 than 0.8, implying strong linkage. Many of these are cases where one allele is very rare (i.e. occurs once) and  
 820 thus overlaps completely with any other alleles found in that particular individual. In general, the relatively low  
 821 levels of co-occurrence means that allele effects could be estimated independently of the presence or absence  
 822 of other alleles in most cases. There were 37 allele pairs that were reciprocally complete overlapping in  
 823 occurrence; one allele from each of these pairs was removed for the data set prior to estimating effect sizes.

824
